# Supplementary material for: Underlying mechanisms of complex interventions addressing the care of older adults with multimorbidity: a realist review
Source: PubMed Central journal article supplement — BMJ Open. 2019 Apr 3;9(4):e025009. doi: 10.1136/bmjopen-2018-025009 (PMC6500199; doi:10.1136/bmjopen-2018-025009), 2019-04-03
Supplement: bmjopen-2018-025009supp001.pdf [file bmjopen-2018-025009supp001.pdf]

## Appendix 1

### Medline search strategy for rough program theory 2 (health prioritization of multiple chronic conditions)

1. Primary Health Care/
2. Physicians, Family/
3. general practice/ or family practice/
4. (healthcare adj (professional or provider)).tw.
5. or/1-4
6. exp Geriatric Assessment/
7. \*"Referral and Consultation"/
8. Decision Making/
9. Decision Support Systems, Clinical/
10. (consult\$ or refer\$).tw.
11. health planning/ or health planning guidelines/
12. ((Shared or sharing or shares) adj ("decision making" or "decision-making" or "decision making process" or "decision-making process")).tw.
13. Patient Participation/
14. or/6-13
15. 5 and 14
16. (chronic disease\$ adj2 management tool\$).tw.
17. Chronic Disease/
18. ((chronic\* or longterm or long-term) adj (care or condition\* or disabilit\* or disease\* or disorder\* or health\* or ill or illness\* or morbidit\* or syndrom\* or symptom\*)).ti,ab.
19. ((multi or multiple) adj2 (condition\* or disabilit\* or disease\* or disorder\* or ill or illness\* or morbidit\*)).ti,ab.
20. (multimorbid\* or multi-morbid\*).ti,ab.
21. ((complicated or complex) adj (health or healthcare or illness\* or morbidit\*)).ti,ab.
22. Comorbidity/
23. (comorbid\* or co-morbid\*).ti,ab.
24. exp disease management/
25. ((chronic\* or (multi\* adj chronic\*)) adj (disease\* or patient\$1) adj manag\*).ti,ab.
26. ((self or personal\*) adj2 (administ\* or care or control\* or manag\* or monitor\*)).ti,ab.
27. (17 or 18 or 19 or 20 or 21 or 22 or 23) and 26
28. or/16-25,27
29. (geriatric\* or gerontolog\*).ti,ab.
30. (elderly or senior? or (old adj age) or (older adj adult?)).ti,ab.
31. Geriatrics/
32. or/29-31
33. Patient Participation/
34. Physician-Patient Relations/
35. Patient Care Planning/
36. \*Patient Care Team/
37. ((physician? or doctor? or provider?) adj ((patient? or client\*) adj relation\*)).tw.
38. "goal-oriented care".ti,ab.
39. ((physician? or doctor? or provider?) adj ((patient? or client\*) adj communicat\*)).tw.
40. ((Patient?-centred or client\*-centered) adj (decision adj mak\*)).tw.
41. (Shar\* adj ("decision-making" or (decision adj mak\*)) adj (process\* or proced\* or method\*)).tw.
42. or/33-41
43. 32 and 42
44. Health Priorities/
45. ("Re-prioritization" or "prioritization" or priorit\*).tw.
46. (Priorit\* adj guideline?).tw.
47. ("health care" adj priorit\*).tw.
48. "pivot point".tw.

49. ((chronic\* adj (care or condition\* or disabilit\* or disease\* or disorder\* or health\* or ill or illness\* or morbidit\* or syndrom\* or symptom\*)) and (manag\* adj priorit\*)).tw.

50. (trad\* adj off?).ti,ab.

51. or/44-50

52. 15 or 43

53. 52 and 51 and 28

48. ((chronic\* adj (care or condition\* or disabilit\* or disease\* or disorder\* or health\* or ill or illness\* or morbidit\* or syndrom\* or symptom\*)) and (manag\* adj priorit\*)).tw.

49. (trade\* adj off?).ti,ab.

50. or/44-49

51. 15 or 43

52. 51 and 50 and 28

**Appendix 2**  
Codebook for identifying concept themes – Program Theory 1

| Concept                                                                                                                                                                          | Concept definition                                                                                                                                                                                                                                                                                                                                                                                                                                                                                                                                                                                                                                                                                                                                                                                                                                                                                                                                                                                                                                                                                                                                                                                                                                                                                                                                                                                                                                                                                                                                                                                                                                                                                                                 | Source (Reference number)                                                                                                                                   |
|----------------------------------------------------------------------------------------------------------------------------------------------------------------------------------|------------------------------------------------------------------------------------------------------------------------------------------------------------------------------------------------------------------------------------------------------------------------------------------------------------------------------------------------------------------------------------------------------------------------------------------------------------------------------------------------------------------------------------------------------------------------------------------------------------------------------------------------------------------------------------------------------------------------------------------------------------------------------------------------------------------------------------------------------------------------------------------------------------------------------------------------------------------------------------------------------------------------------------------------------------------------------------------------------------------------------------------------------------------------------------------------------------------------------------------------------------------------------------------------------------------------------------------------------------------------------------------------------------------------------------------------------------------------------------------------------------------------------------------------------------------------------------------------------------------------------------------------------------------------------------------------------------------------------------|-------------------------------------------------------------------------------------------------------------------------------------------------------------|
| <b>BARRIERS</b>                                                                                                                                                                  |                                                                                                                                                                                                                                                                                                                                                                                                                                                                                                                                                                                                                                                                                                                                                                                                                                                                                                                                                                                                                                                                                                                                                                                                                                                                                                                                                                                                                                                                                                                                                                                                                                                                                                                                    |                                                                                                                                                             |
| <b>Barriers to effective chronic disease management interventions</b>                                                                                                            | <p><b>GENERAL BARRIERS:</b></p> <ul style="list-style-type: none"> <li>• Barrier factors or challenges to achieving effectiveness, impact, intended performance of chronic disease management interventions. Barriers related to specific types of interventions are described below</li> <li>• These tools can be targeted to clinicians, providers, other health care professionals and patients and used in any setting (e.g., primary care, hospital, home)</li> <li>• Examples: <ul style="list-style-type: none"> <li>○ Interventions are not directed to enhance patient self-management</li> </ul> </li> </ul> <p><b>IMPLEMENTATION BARRIERS</b></p> <ul style="list-style-type: none"> <li>• This includes barrier factors related specifically to the implementation of the intervention, which can include factors/processes/obstacles that are identified as possible points of modification for future implementation of a similar intervention.</li> <li>• Barriers to positive adaptation to and use of the intervention (emotional, cognitive, or physical dimensions that impede patients’ use of the system).</li> <li>• It can also be about the “delivery” mechanisms of the intervention that may hinder its adoption or uptake</li> <li>• Implementation barriers can relate to situations where family members are protective of vulnerable residents (in a LTC setting), which may lead them to withhold permission for their relatives to participate in the study.</li> <li>• These intervention designs often presuppose the availability of informal support systems even though the impact of treatment burden on both caregivers and patients with chronic conditions is well documented.</li> </ul> | <ul style="list-style-type: none"> <li>• 23-26</li> </ul>                                                                                                   |
| <p><b>Behavioural interventions</b></p> <ul style="list-style-type: none"> <li>• <i>Cognitive behavioural therapy</i></li> <li>• <i>Self-management interventions</i></li> </ul> | <p><b>GENERAL BARRIERS</b></p> <ul style="list-style-type: none"> <li>• Factors that negatively influence behavioural interventions</li> <li>• Universal Medication Schedule: <i>The aim was to standardize prescription labeling and to provide a simple chart bringing all medicines in a patients’ regimen together over 4 dosing periods through the day and which also explains the purpose of each medication to improve understanding.</i></li> </ul>                                                                                                                                                                                                                                                                                                                                                                                                                                                                                                                                                                                                                                                                                                                                                                                                                                                                                                                                                                                                                                                                                                                                                                                                                                                                       | <ul style="list-style-type: none"> <li>• 15,27-32</li> </ul> <p>Self-management interventions</p> <ul style="list-style-type: none"> <li>• 29,33</li> </ul> |

|                                                                                                                                                                                                                                                                                                                                                                                                                                   |                                                                                                                                                                                                                                                                                                                                                                                                                                                                                                                                                                                                                                                                                                                                                                                                                                                                                                                                                                                                       |                                                                 |
|-----------------------------------------------------------------------------------------------------------------------------------------------------------------------------------------------------------------------------------------------------------------------------------------------------------------------------------------------------------------------------------------------------------------------------------|-------------------------------------------------------------------------------------------------------------------------------------------------------------------------------------------------------------------------------------------------------------------------------------------------------------------------------------------------------------------------------------------------------------------------------------------------------------------------------------------------------------------------------------------------------------------------------------------------------------------------------------------------------------------------------------------------------------------------------------------------------------------------------------------------------------------------------------------------------------------------------------------------------------------------------------------------------------------------------------------------------|-----------------------------------------------------------------|
|                                                                                                                                                                                                                                                                                                                                                                                                                                   | <p><b><u>Clinic-based self-management interventions for patients</u></b></p> <p>One possibility [for why self-management interventions struggle to achieve reach] is that most forms of intervention, whether provider based or patient based, are outside patients’ workaday and social activities, so fail to embed themselves into their everyday lives.</p>                                                                                                                                                                                                                                                                                                                                                                                                                                                                                                                                                                                                                                       |                                                                 |
| <p><b><i>Coordination of care interventions</i></b></p> <ul style="list-style-type: none"> <li>• Collaborative care</li> <li>• Case/care-management</li> <li>• Consultations/consultation services</li> <li>• Multidisciplinary care</li> <li>• Shared care</li> <li>• Teams</li> <li>• Stepped-care strategies</li> <li>• Chronic Care Model</li> <li>• Advanced Practice Nursing</li> <li>• Patient-partner approach</li> </ul> | <p><b>GENERAL BARRIERS</b></p> <ul style="list-style-type: none"> <li>• Factors that negatively influence coordination of care interventions</li> </ul>                                                                                                                                                                                                                                                                                                                                                                                                                                                                                                                                                                                                                                                                                                                                                                                                                                               | <ul style="list-style-type: none"> <li>• 27,34-41</li> </ul>    |
|                                                                                                                                                                                                                                                                                                                                                                                                                                   | <p><b>IMPLEMENTATION BARRIERS</b></p> <ul style="list-style-type: none"> <li>• Factors that negatively influence the <u>implementation</u> of coordination of care interventions</li> </ul> <p><b><u>Shared care implementation barriers:</u></b></p> <ul style="list-style-type: none"> <li>• If care providers are less easily convinced of the feasibility of shared care models because of the traditional professional boundaries they find difficult to give up or change.</li> </ul>                                                                                                                                                                                                                                                                                                                                                                                                                                                                                                           | <ul style="list-style-type: none"> <li>• 15,38,42-45</li> </ul> |
| <p><b><i>Health information technology tools:</i></b></p> <ul style="list-style-type: none"> <li>• Clinical decision support systems (CDSSs)</li> <li>• Computer-based counseling systems (CBCSs)</li> <li>• Health information technology (IT) tools</li> <li>• SmartForm</li> <li>• Telecare / Telemedicine</li> <li>• Telemonitoring</li> <li>• Videoconferencing systems</li> </ul>                                           | <p><b>GENERAL BARRIERS:</b></p> <ul style="list-style-type: none"> <li>• Factors that negatively influence health information technology tools</li> </ul>                                                                                                                                                                                                                                                                                                                                                                                                                                                                                                                                                                                                                                                                                                                                                                                                                                             | <ul style="list-style-type: none"> <li>• 29,37,46-53</li> </ul> |
|                                                                                                                                                                                                                                                                                                                                                                                                                                   | <p><b>IMPLEMENTATION BARRIERS:</b></p> <ul style="list-style-type: none"> <li>• Factors that negatively influence the use of technology based or computer-based tools or systems (e.g., low use).</li> <li>• Factors that influence adaptability of health information technology tools (i.e., factors that affect how people adapt to using the system to manage their chronic conditions)</li> <li>• Issues such as data decentralization, security, and privacy often prevent the implementation of health IT.</li> </ul> <p><b><u>Video-image conferencing implementation barriers:</u></b></p> <ul style="list-style-type: none"> <li>• Socioeconomic, technological, political and professional barriers</li> <li>• The lack of uniform policies and standards for health care facilities and patient confidentiality issues in the infrastructure at state and national levels</li> <li>• Arbitrary boundaries for services</li> <li>• High costs to support broadband connectivity</li> </ul> | <ul style="list-style-type: none"> <li>• 48,50,51,54</li> </ul> |

|  |                                                                                           |                                                                                                                                                                                                                                                                                                                                                                                                                                                                                                                                                                                                                                                                                                                                                                                                                                                                                                                                                                                                                                                                                                                                                                        |                                                                                                            |
|--|-------------------------------------------------------------------------------------------|------------------------------------------------------------------------------------------------------------------------------------------------------------------------------------------------------------------------------------------------------------------------------------------------------------------------------------------------------------------------------------------------------------------------------------------------------------------------------------------------------------------------------------------------------------------------------------------------------------------------------------------------------------------------------------------------------------------------------------------------------------------------------------------------------------------------------------------------------------------------------------------------------------------------------------------------------------------------------------------------------------------------------------------------------------------------------------------------------------------------------------------------------------------------|------------------------------------------------------------------------------------------------------------|
|  |                                                                                           | <ul style="list-style-type: none"> <li>Public and private payers' reluctance to establish reimbursement policy at lower levels adds another obstacle to broader deployment of real world Telemedicine.</li> </ul> <p><b><u>Computer-based counselling implementation barriers</u></b></p> <ul style="list-style-type: none"> <li>Lack of implementation by care staff, which could lead to failure to produce an effect</li> </ul> <p><b><u>Telephone/telemonitoring implementation barriers</u></b></p> <ul style="list-style-type: none"> <li>Inconsistent interactions with patients.</li> <li>Completing the minimum number of telephone / telemonitoring calls prior to patient discharge.</li> <li>Communication and collaboration barriers between nurses and physicians.</li> <li>Being unaccustomed to modern technology.</li> <li>Fear and avoidance of modern technology ('computer anxiety') which can impede implementation and use of home telecare management system.</li> <li>Nurses had to be assisted with physician communication by other personnel who would send letters for non-urgent requests or calling directly for urgent ones.</li> </ul> |                                                                                                            |
|  | <p><b>Barriers to the <u>management</u> of multiple chronic diseases</b></p>              | <p><b>GENERAL BARRIERS</b></p> <ul style="list-style-type: none"> <li>Barriers to the complexity of care required to manage multiple chronic conditions (i.e., multiple prescribers, multiple providers; consumer knowledge gaps about treatment)</li> <li>Examples: <ul style="list-style-type: none"> <li>Having a limited consultation time</li> <li>Multiple providers</li> <li>Undefined roles of GPs and specialists</li> <li>The presence of simultaneous care plans for multiple conditions can lead to confusion, which can generate safety hazards.</li> </ul> </li> </ul>                                                                                                                                                                                                                                                                                                                                                                                                                                                                                                                                                                                   | <ul style="list-style-type: none"> <li>15,23,26,33,35-40,45,50,51,55-86</li> </ul>                         |
|  | <p><b>Barriers to effective <u>self-management</u> of multiple chronic conditions</b></p> | <p><b>GENERAL BARRIERS:</b></p> <ul style="list-style-type: none"> <li>Barriers that patients experience in self-managing their multiple chronic illnesses.</li> <li>Examples: <ul style="list-style-type: none"> <li>Difficulty following exercise and dietary plans</li> <li>Depression</li> <li>Fatigue</li> <li>Poor communication with physicians</li> <li>Lack of social support</li> <li>Pain and physical symptoms</li> <li>Financial problems</li> <li>Lack of awareness</li> <li>Lack of information</li> </ul> </li> </ul>                                                                                                                                                                                                                                                                                                                                                                                                                                                                                                                                                                                                                                  | <ul style="list-style-type: none"> <li>15,23,25,26,28-32,36,43,51,55,56,59,61-65,72,74,85,87-95</li> </ul> |

|                                                                     |                                                                                                                                                                                                                                                                                                                                                                                                                                                                                                                                                                                                                                                                                                                                                                                                                                                                                                                                                                                                                                             |                                                                                                            |
|---------------------------------------------------------------------|---------------------------------------------------------------------------------------------------------------------------------------------------------------------------------------------------------------------------------------------------------------------------------------------------------------------------------------------------------------------------------------------------------------------------------------------------------------------------------------------------------------------------------------------------------------------------------------------------------------------------------------------------------------------------------------------------------------------------------------------------------------------------------------------------------------------------------------------------------------------------------------------------------------------------------------------------------------------------------------------------------------------------------------------|------------------------------------------------------------------------------------------------------------|
|                                                                     | <ul style="list-style-type: none"> <li>○ Emotional impact of having multiple chronic conditions</li> <li>• Multimorbidity reduces the capacity of patients to modify their lifestyle, their ability to seek help and to manage multiple medications.</li> <li>• Multimorbidity also has a significant economic impact on patients because of the costs associated with their care, which may be compounded by their inability to work as the conditions progress.</li> </ul>                                                                                                                                                                                                                                                                                                                                                                                                                                                                                                                                                                |                                                                                                            |
| <b>Barriers to using existing guidelines for disease management</b> | <p><b>GENERAL BARRIERS</b></p> <ul style="list-style-type: none"> <li>• Barriers or challenges faced by physicians to using existing guidelines for disease management, which tend to focus on a single disease</li> <li>• Lack of guidelines for managing multiple chronic diseases, which may lead to provider lack of knowledge of optimal care pathway</li> </ul>                                                                                                                                                                                                                                                                                                                                                                                                                                                                                                                                                                                                                                                                       | <ul style="list-style-type: none"> <li>• 25,37,39,40,56-58,60,61, 63,66,72,74-76,83,86,89,96-99</li> </ul> |
| <b>Chronic disease interrelatedness</b>                             | <p><b>GENERAL BARRIERS</b></p> <ul style="list-style-type: none"> <li>• Chronic diseases may be interrelated</li> <li>• The course of one chronic disease may influence the course of the other disease (e.g., Depression and dyspnea-related disability)</li> <li>• The influence of treatment(s) for one chronic disease on the outcomes of other co-existing chronic diseases</li> <li>• The additive impact of one disease to the other</li> <li>• The impact or burden of one disease on the treatment demands of the second disease (e.g., Diabetes magnifies the demands of COPD treatment).</li> <li>• Multimorbidity may present as a collection of long-term conditions that share common risk factors (e.g. chronic obstructive pulmonary disease and cardiovascular disease as a result of smoking) or when one condition leads to another as a complication.</li> <li>• Quality of life for people with multimorbidity is inversely related to the number of conditions they have and the extent of any disability.</li> </ul> | <ul style="list-style-type: none"> <li>• 3,9,28,30,35,45,55,65, 69,71,74,82,92,100-102</li> </ul>          |
| <b>Depression + Diabetes</b>                                        | The additive impact of depression and diabetes lead to functional impairment including a higher number of cardiac risk factors, increased micro- and macrovascular complications in addition to poor self-care and increased mortality.                                                                                                                                                                                                                                                                                                                                                                                                                                                                                                                                                                                                                                                                                                                                                                                                     | <ul style="list-style-type: none"> <li>• 101</li> </ul>                                                    |
| <b>Diabetes + Chronic Kidney Disease</b>                            | Irrespective of the cause of kidney disease, the co-existence of diabetes, CKD and hypertension leads to synergistic adverse effects: mortality is higher, quality of life is worse and the burden on healthcare services is increased.                                                                                                                                                                                                                                                                                                                                                                                                                                                                                                                                                                                                                                                                                                                                                                                                     | <ul style="list-style-type: none"> <li>• 27,35,55,103</li> </ul>                                           |
| <b>Depression + Pain</b>                                            | Improved arthritis pain was associated with decreased depression; the concurrent improvement in both conditions supports the close interplay between depression and pain (Lin, 2003).                                                                                                                                                                                                                                                                                                                                                                                                                                                                                                                                                                                                                                                                                                                                                                                                                                                       | <ul style="list-style-type: none"> <li>• 104</li> </ul>                                                    |
| <b>Disease co-management</b>                                        | <p><b>GENERAL BARRIERS</b></p> <ul style="list-style-type: none"> <li>• The care or management of two diseases simultaneously</li> <li>• Suggestions on treatment of co-existing diseases (e.g., depression + arthritis)</li> </ul>                                                                                                                                                                                                                                                                                                                                                                                                                                                                                                                                                                                                                                                                                                                                                                                                         | <ul style="list-style-type: none"> <li>• 9,27,30,34,35,39,61,62,65,72,74, 82,105</li> </ul>                |

|                                                                                                                                                                                                                                |                                                                                                                                                                                                                                                                                                                                                                                                                                                                                                                                                                                                                                                                                                                                                                                                                                                                                                                                                                                                                                                                                                                                                                                                                                                                                   |                                                                                                                                                                                                                                                                                                                                                              |
|--------------------------------------------------------------------------------------------------------------------------------------------------------------------------------------------------------------------------------|-----------------------------------------------------------------------------------------------------------------------------------------------------------------------------------------------------------------------------------------------------------------------------------------------------------------------------------------------------------------------------------------------------------------------------------------------------------------------------------------------------------------------------------------------------------------------------------------------------------------------------------------------------------------------------------------------------------------------------------------------------------------------------------------------------------------------------------------------------------------------------------------------------------------------------------------------------------------------------------------------------------------------------------------------------------------------------------------------------------------------------------------------------------------------------------------------------------------------------------------------------------------------------------|--------------------------------------------------------------------------------------------------------------------------------------------------------------------------------------------------------------------------------------------------------------------------------------------------------------------------------------------------------------|
|                                                                                                                                                                                                                                | <ul style="list-style-type: none"> <li>The need to simultaneously manage multiple chronic conditions complicate care management - escalating challenges of understanding a growing number of different clinical conditions while attempting to monitor combinations of different symptoms, and reporting symptom and functional status changes to multiple providers from different specialties, and adhering to different medication administration and other care plans.</li> </ul>                                                                                                                                                                                                                                                                                                                                                                                                                                                                                                                                                                                                                                                                                                                                                                                             |                                                                                                                                                                                                                                                                                                                                                              |
| <b>FACILITATORS</b>                                                                                                                                                                                                            |                                                                                                                                                                                                                                                                                                                                                                                                                                                                                                                                                                                                                                                                                                                                                                                                                                                                                                                                                                                                                                                                                                                                                                                                                                                                                   |                                                                                                                                                                                                                                                                                                                                                              |
| <b>Facilitators of effective chronic disease management interventions</b>                                                                                                                                                      | <p><b>GENERAL FACILITATORS</b></p> <ul style="list-style-type: none"> <li>Facilitator factors (positive attributes) that contribute to the effectiveness, impact, intended performance of chronic disease management interventions</li> <li>Impact can directly affect patients or healthcare providers or the system or how patients access or use health services or the management of their diseases</li> <li>Care plans [in the context of multiple chronic conditions need to incorporate not only biomedical but also psychosocial factors, such as mood, informal care network, and patient income/finances.</li> <li>Participants reported feeling supported and reassured through the intervention because they were in contact with individuals who listened, understood and empathized with them and validated the challenges of living with the many consequences of their health conditions.</li> </ul> <p><b>IMPLEMENTATION FACILITATORS</b></p> <ul style="list-style-type: none"> <li>This includes facilitator factors related specifically to the implementation of the intervention. These can also include factors/processes/obstacles that are identified as possible points of modification for future implementation of a similar intervention.</li> </ul> | <ul style="list-style-type: none"> <li>23,37,55,63,76,92,106</li> </ul>                                                                                                                                                                                                                                                                                      |
| <p><b><i>Behavioural interventions</i></b></p> <ul style="list-style-type: none"> <li><i>Cognitive behavioural therapy (CBT)</i></li> <li><i>Behaviour activation</i></li> <li><i>Self-management interventions</i></li> </ul> | <p><b>GENERAL FACILITATORS</b></p> <p><u>Cognitive behavior therapy (CBT) facilitators:</u></p> <ul style="list-style-type: none"> <li>Having trained practice nurses deliver the intervention.</li> </ul> <p><u>Behaviour activation facilitators:</u></p> <ul style="list-style-type: none"> <li>Strategies to activate patients to perform particular health behaviors. (i.e. medication self-efficacy and adherence)</li> </ul> <p><u>Self-management interventions</u></p> <ul style="list-style-type: none"> <li>Universal Medication Schedule: The aim was to standardize prescription labeling and to provide a simple chart bringing all medicines in a patients' regimen together over 4 dosing periods through the day and which also explains the purpose of each medication to improve understanding.</li> <li>Interventions that target improving patient self-management behavior/skills.</li> </ul>                                                                                                                                                                                                                                                                                                                                                               | <p>General</p> <ul style="list-style-type: none"> <li>15,26,28,31,107</li> </ul> <p>CBT:</p> <ul style="list-style-type: none"> <li>28,34,104</li> </ul> <p>Behaviour activation</p> <ul style="list-style-type: none"> <li>30,71</li> </ul> <p>Self-management interventions</p> <ul style="list-style-type: none"> <li>15,28,29,31,33,55,94,108</li> </ul> |

|                                                                                                                                                                                                                                                                                                                                                                                                                                                                                                                         |                                                                                                                                                                                                                                                                                                                                                                                                                                                                                                                                                                                                                                                                                                                                                                                                                                                                                                                                                                                                                                                                                                                                                                                                                                                                                                                                                                                                                                                                                                                                                                                                                |                                                                                                                                                                                                                                                                                                                                                                                                                                                                                                                                                                                                                                                                            |
|-------------------------------------------------------------------------------------------------------------------------------------------------------------------------------------------------------------------------------------------------------------------------------------------------------------------------------------------------------------------------------------------------------------------------------------------------------------------------------------------------------------------------|----------------------------------------------------------------------------------------------------------------------------------------------------------------------------------------------------------------------------------------------------------------------------------------------------------------------------------------------------------------------------------------------------------------------------------------------------------------------------------------------------------------------------------------------------------------------------------------------------------------------------------------------------------------------------------------------------------------------------------------------------------------------------------------------------------------------------------------------------------------------------------------------------------------------------------------------------------------------------------------------------------------------------------------------------------------------------------------------------------------------------------------------------------------------------------------------------------------------------------------------------------------------------------------------------------------------------------------------------------------------------------------------------------------------------------------------------------------------------------------------------------------------------------------------------------------------------------------------------------------|----------------------------------------------------------------------------------------------------------------------------------------------------------------------------------------------------------------------------------------------------------------------------------------------------------------------------------------------------------------------------------------------------------------------------------------------------------------------------------------------------------------------------------------------------------------------------------------------------------------------------------------------------------------------------|
| <p><b><i>Home based Interventions</i></b></p>                                                                                                                                                                                                                                                                                                                                                                                                                                                                           | <p>Home-based services that bring multiple disease management services to people with mobility and other barriers to access to care</p>                                                                                                                                                                                                                                                                                                                                                                                                                                                                                                                                                                                                                                                                                                                                                                                                                                                                                                                                                                                                                                                                                                                                                                                                                                                                                                                                                                                                                                                                        | <ul style="list-style-type: none"> <li>• 109</li> </ul>                                                                                                                                                                                                                                                                                                                                                                                                                                                                                                                                                                                                                    |
| <p><b><i>Coordination of care interventions</i></b></p> <ul style="list-style-type: none"> <li>• <i>Collaborative care</i></li> <li>• <i>Case/care-management</i></li> <li>• <i>Consultations/consultation services</i></li> <li>• <i>Multidisciplinary care</i></li> <li>• <i>Shared care</i></li> <li>• <i>Teams</i></li> <li>• <i>Stepped-care strategies</i></li> <li>• <i>Comprehensive Geriatric Assessment</i></li> <li>• <i>Advanced Practice Nursing</i></li> <li>• <i>Patient-partner approach</i></li> </ul> | <p><b>GENERAL FACILITATORS</b></p> <ul style="list-style-type: none"> <li>• Factors that facilitate (positively influence) coordination of care interventions</li> </ul> <hr/> <p><b>IMPLEMENTATION FACILITATORS</b></p> <p><u>Case/care-management implementation facilitators:</u></p> <ul style="list-style-type: none"> <li>• Having a specialist mental health team.</li> </ul> <p><u>Collaborative care facilitators:</u></p> <ul style="list-style-type: none"> <li>• A practice nurse who can carry out the intervention</li> <li>• Access to clinical software capable of generating a disease registry from which patients could be selected to participate in the trial were the facilitators of the implementation of the intervention.</li> <li>• The design of the intervention which allowed for its easy implementation within general practices and a better use of their existing resources meant that the TrueBlue could be easily applied to patients across general practices at a population level, making the benefit clinically important.</li> </ul> <p><u>Disease management program facilitators:</u></p> <ul style="list-style-type: none"> <li>• Adherence to evidence-based guidelines, which can improve health and cost outcomes</li> <li>• Usefulness (how valuable the users consider the specific features, functions, and data the tool makes available to them)</li> <li>• Value</li> <li>• Satisfaction</li> <li>• Ease of use (how easy it is for a user to complete their desired task with the tool)</li> <li>• Acceptability</li> <li>• Intention to use.</li> </ul> | <ul style="list-style-type: none"> <li>• 15,39,110</li> </ul> <hr/> <ul style="list-style-type: none"> <li>• 9,41,42,61,69,75,78,79,111</li> </ul> <p><u>Collaborative Care:</u></p> <ul style="list-style-type: none"> <li>• 38,103,112</li> </ul> <p><u>Integrated care</u></p> <ul style="list-style-type: none"> <li>• 53,80</li> </ul> <p><u>Coordinated care / Disease management:</u></p> <ul style="list-style-type: none"> <li>• 36,39,45,63,65,81,92,110</li> </ul> <p><u>Advanced Practice Nursing</u></p> <ul style="list-style-type: none"> <li>• 44</li> </ul> <p><u>Patient-partner approach</u></p> <ul style="list-style-type: none"> <li>• 45</li> </ul> |



|                                                                                                                                                                                                                                                                                                                                                                                                                                  |                                                                                                                                                                                                                                                                                                                                                                                                                                                                                                                                                                                                                                                                                                                                                                                                                                                                                                                                                                                             |                                                                            |
|----------------------------------------------------------------------------------------------------------------------------------------------------------------------------------------------------------------------------------------------------------------------------------------------------------------------------------------------------------------------------------------------------------------------------------|---------------------------------------------------------------------------------------------------------------------------------------------------------------------------------------------------------------------------------------------------------------------------------------------------------------------------------------------------------------------------------------------------------------------------------------------------------------------------------------------------------------------------------------------------------------------------------------------------------------------------------------------------------------------------------------------------------------------------------------------------------------------------------------------------------------------------------------------------------------------------------------------------------------------------------------------------------------------------------------------|----------------------------------------------------------------------------|
| <p><b>Health Information Technology Tools</b></p> <ul style="list-style-type: none"> <li>• <i>Clinical decision support systems (CDSSs)</i></li> <li>• <i>Computer-based counseling systems (CBCSs)</i></li> <li>• <i>Health information technology (IT) tools</i></li> <li>• <i>SmartForm</i></li> <li>• <i>Telecare / Telemedicine</i></li> <li>• <i>Telemonitoring</i></li> <li>• <i>Videoconferencing systems</i></li> </ul> | <p><b>GENERAL FACILITATORS</b></p> <ul style="list-style-type: none"> <li>• Factors that facilitate (positively influence) health information technology tools</li> <li>• Health information technology can promote coordination of care and improve quality and safety.</li> </ul> <p><u>Telephone/telemonitoring facilitators:</u></p> <ul style="list-style-type: none"> <li>• Good disease management combined with the deployment of the technology</li> <li>• Telemonitoring was managed by primary care professionals (GPs and nurses) who regularly see their patients in health centres or at home than if the intervention was in-hospital;</li> <li>• The perception of facilitators in the increasing healthcare professionals' intention to use telemonitoring technology (organizational context is the most important variable);</li> <li>• Paying attention to the proper clinical management of patient's conditions.</li> <li>• Universal Medication Schedule.</li> </ul> | <ul style="list-style-type: none"> <li>• 27,29,46-52,54,108,113</li> </ul> |
| <p><i>Self-management interventions?</i></p>                                                                                                                                                                                                                                                                                                                                                                                     | <p><b>GENERAL FACILITATORS</b></p> <ul style="list-style-type: none"> <li>• Factors that facilitate self-management.</li> <li>• Impact on self-management can occur in the emotional, physical, and financial domain, but is not restricted to these</li> </ul>                                                                                                                                                                                                                                                                                                                                                                                                                                                                                                                                                                                                                                                                                                                             | <ul style="list-style-type: none"> <li>• 27,50,77,84,108,114</li> </ul>    |

|                                                                                                 |                                                                                                                                                                                                                                                                                                                                                                                                                                                                                                                                                                                                                                                                                                                                                                                                                                                                                                                                                                                                                                                                                                                                                                                                                                                                                                                                                                                                                                                                                                                                                                                                                                                                                                                                                                                                                                                                                                                                                                                                                                                                                                                                                                                                                                                                                                                                                                                            |                                                                                                                                                           |
|-------------------------------------------------------------------------------------------------|--------------------------------------------------------------------------------------------------------------------------------------------------------------------------------------------------------------------------------------------------------------------------------------------------------------------------------------------------------------------------------------------------------------------------------------------------------------------------------------------------------------------------------------------------------------------------------------------------------------------------------------------------------------------------------------------------------------------------------------------------------------------------------------------------------------------------------------------------------------------------------------------------------------------------------------------------------------------------------------------------------------------------------------------------------------------------------------------------------------------------------------------------------------------------------------------------------------------------------------------------------------------------------------------------------------------------------------------------------------------------------------------------------------------------------------------------------------------------------------------------------------------------------------------------------------------------------------------------------------------------------------------------------------------------------------------------------------------------------------------------------------------------------------------------------------------------------------------------------------------------------------------------------------------------------------------------------------------------------------------------------------------------------------------------------------------------------------------------------------------------------------------------------------------------------------------------------------------------------------------------------------------------------------------------------------------------------------------------------------------------------------------|-----------------------------------------------------------------------------------------------------------------------------------------------------------|
| <p><b>Facilitators of the <u>management</u> of multiple chronic diseases/multimorbidity</b></p> | <p><b>GENERAL FACILITATORS</b></p> <ul style="list-style-type: none"> <li>• Factors that facilitate the patient’s management of multiple chronic conditions.</li> <li>• “Factors” may include the qualities and components of the intervention that make it easier/simpler to manage a patient’s multiple chronic conditions (manage: to stabilize, control, or improve a patient’s health or quality of living with multiple chronic conditions).</li> <li>• Care plans that are clear and blend clinical care with self-management are essential in multimorbidity; they need to incorporate not only biomedical but also psychosocial factors, such as mood, informal care network, and patient income/finances.</li> <li>• Examples: <ul style="list-style-type: none"> <li>○ The biopsychosocial approach to care can be applied to patients with both depression and arthritis; it should include depression screening in a systematic assessment of pain among older patients with symptomatic osteoarthritis.<sup>104</sup></li> <li>○ Medical management of arthritis can integrate evidence-based depression treatment with patient education and support for self-management (eg, exercise) to maximize functional status and quality of life.”</li> <li>○ The facilitators that are proposed to assist patients with the management of depression and arthritis are 1) the inclusion of depression screening with pain assessment, and 2) the integration of depression treatment with patient education and self-management support.</li> </ul> </li> <li>• This concept is different from “Facilitators of effective chronic disease management interventions/programmes” because the latter concept looks at explaining why an intervention/program works <ul style="list-style-type: none"> <li>○ For example, Lamers<sup>28</sup> explains, “Minimal interventions like our MPI – that (1) may provide patients with the skills to cope with the consequences of their illness and their depressive symptoms, (2) can be incorporated in existing disease and care management programs, (3) can be administered by nurses (e.g. practice nurses).” It is <i>because</i> the intervention provides patients with certain skills, and its implementation is favourable, that the MPI is able to be implemented and foster positive patient outcomes.</li> </ul> </li> </ul> | <ul style="list-style-type: none"> <li>• 15,26,30,32,33,37,39, 40,45-47, 55-59,61,62,72,74-76,81,82, 84,86,88,89,92-94,98,102,104, 105,115-120</li> </ul> |
| <p><b>Facilitators of effective <u>self-management</u> of multiple chronic conditions</b></p>   | <p><b>GENERAL FACILITATORS</b></p> <ul style="list-style-type: none"> <li>• Factors that facilitate self-management of multiple chronic conditions.</li> <li>• Examples: <ul style="list-style-type: none"> <li>○ The support of family, including reminders to take medication and avoidance of eating unhealthy foods, and social relationships serve as motivators for patients to more effectively manage their conditions.<sup>62</sup></li> </ul> </li> </ul>                                                                                                                                                                                                                                                                                                                                                                                                                                                                                                                                                                                                                                                                                                                                                                                                                                                                                                                                                                                                                                                                                                                                                                                                                                                                                                                                                                                                                                                                                                                                                                                                                                                                                                                                                                                                                                                                                                                        | <ul style="list-style-type: none"> <li>• 26,33,36,47,51,56,64,71,85,87,90, 91,93-95,108,115</li> </ul>                                                    |

|                                                                                    |                                                                                                                                                                                                                                                                                                                                                                                                                                                                                                                                                                                                                                                                                                                                                                                                                                                                                                                                                                                                                                                                                                                                                                                                                                                                                                                                                                                                                                                                                                                                                                                                                                                                                                                                         |                                                                             |
|------------------------------------------------------------------------------------|-----------------------------------------------------------------------------------------------------------------------------------------------------------------------------------------------------------------------------------------------------------------------------------------------------------------------------------------------------------------------------------------------------------------------------------------------------------------------------------------------------------------------------------------------------------------------------------------------------------------------------------------------------------------------------------------------------------------------------------------------------------------------------------------------------------------------------------------------------------------------------------------------------------------------------------------------------------------------------------------------------------------------------------------------------------------------------------------------------------------------------------------------------------------------------------------------------------------------------------------------------------------------------------------------------------------------------------------------------------------------------------------------------------------------------------------------------------------------------------------------------------------------------------------------------------------------------------------------------------------------------------------------------------------------------------------------------------------------------------------|-----------------------------------------------------------------------------|
| <p><b>Facilitators to using existing guidelines for disease management</b></p>     | <ul style="list-style-type: none"> <li>• Includes examples of situations when practitioners thought it was useful to use or adhere to guidelines</li> <li>• Includes suggested ways to improve usefulness or helpfulness of guidelines.</li> <li>• Examples: <ul style="list-style-type: none"> <li>• Adhering to guidelines promotes working transparently</li> <li>• Guidelines would be helpful for multimorbid patients if they provided more details on diagnostic, treatment, and management priorities</li> <li>• Guidelines improve the quality of general practice</li> </ul> </li> </ul> <p>Guidelines provide guidance to medical decision-making</p>                                                                                                                                                                                                                                                                                                                                                                                                                                                                                                                                                                                                                                                                                                                                                                                                                                                                                                                                                                                                                                                                        | <ul style="list-style-type: none"> <li>• 98</li> </ul>                      |
| <p><b>Factors influencing the management chronic conditions/multimorbidity</b></p> | <ul style="list-style-type: none"> <li>• Factors that influence the management of patients with chronic conditions (directionality not specified). <ul style="list-style-type: none"> <li>○ Factors that may influenced doctors' varying views on the preparedness of their practices to manage patients with different types of complex needs include: the organization of primary care, workforce training, use of teamwork, size of practice, payment strategies and incentives, health IT (information technology) capacity, and the availability of community services may play a role.<sup>54</sup></li> </ul> </li> </ul>                                                                                                                                                                                                                                                                                                                                                                                                                                                                                                                                                                                                                                                                                                                                                                                                                                                                                                                                                                                                                                                                                                        | <ul style="list-style-type: none"> <li>• 37,54,92,117</li> </ul>            |
| <p><b>Factors which affect treatment adherence</b></p>                             | <ul style="list-style-type: none"> <li>• Factors that influence patient's engagement with the recommendations made by the physician (i.e. factors that cause the patients to follow or not follow the recommendations). <ul style="list-style-type: none"> <li>○ A key element influencing patient's engagement with multiple self-management practices was interaction with health professionals, and this was also related to perceived appropriateness of information received<sup>93</sup>.</li> <li>○ The GP's response conflicted with her priorities and had a negative impact on what she felt able to engage with in managing her health. Where self-management instructions and information from the GP were incongruent with personal priorities as illustrated above, respondents remained disengaged from professional advice<sup>93</sup>.</li> <li>○ In our interviews with 34 patients we had enquired about their willingness to be involved. The level of involvement depended on the nature of the problem. If it was a medical theme, patients preferred to follow the professional recommendation of their GP; however, if the theme had a direct impact on their daily lives (e.g. changes at home), the patients themselves wanted to make the decision. In general, patients expressed a need for undivided attention, understandable information, time, and a calm atmosphere in the consultation<sup>25</sup>.</li> </ul> </li> <li>• Factors that influence the compliance of medication, typically long-term compliance. <ul style="list-style-type: none"> <li>○ Strategies that include extrinsic motivators will promote long-term compliance and reduce recidivism.<sup>50</sup></li> </ul> </li> </ul> | <ul style="list-style-type: none"> <li>• 25,50,93</li> </ul>                |
| <p><b>Risk factors for multimorbidity</b></p>                                      | <ul style="list-style-type: none"> <li>• This concept is different from "factors influencing the management of chronic conditions" as they lead to multimorbidity instead of influencing the management of multimorbidity once individuals have it</li> </ul>                                                                                                                                                                                                                                                                                                                                                                                                                                                                                                                                                                                                                                                                                                                                                                                                                                                                                                                                                                                                                                                                                                                                                                                                                                                                                                                                                                                                                                                                           | <ul style="list-style-type: none"> <li>• 3,15,69,70,83,84,97,121</li> </ul> |

|  |                                                                                                                                                                                                                                                                                                                                                                                                                                                                                                                                                                 |  |
|--|-----------------------------------------------------------------------------------------------------------------------------------------------------------------------------------------------------------------------------------------------------------------------------------------------------------------------------------------------------------------------------------------------------------------------------------------------------------------------------------------------------------------------------------------------------------------|--|
|  | <ul style="list-style-type: none"><li>• Risk factors may be social determinants of health that put individuals at risk for multimorbidity or predispose individuals to multimorbidity</li><li>• Examples:<ul style="list-style-type: none"><li>○ Being socioeconomically deprived</li><li>○ Low income</li><li>○ Individuals with multiple comorbidities, who frequently experience mental health problems and illnesses, are often of low socioeconomic status and have unmet basic needs, such as housing, employment and transportation.</li></ul></li></ul> |  |
|--|-----------------------------------------------------------------------------------------------------------------------------------------------------------------------------------------------------------------------------------------------------------------------------------------------------------------------------------------------------------------------------------------------------------------------------------------------------------------------------------------------------------------------------------------------------------------|--|

## Codebook for identifying concept themes – Program Theory 2

| Concept                                              | Concept definition                                                                                                                                                                                                                                                                                                                                                                                                                                                                                                                                                                                                                                                                                                                                                                                                                                                                                                                                                                                                                                                                                                                                                                                                                                                                                                                                                                                                                                                                                                                                                                                                                                                                                                                                                                                                                                                                                                              | Source                                                                             |
|------------------------------------------------------|---------------------------------------------------------------------------------------------------------------------------------------------------------------------------------------------------------------------------------------------------------------------------------------------------------------------------------------------------------------------------------------------------------------------------------------------------------------------------------------------------------------------------------------------------------------------------------------------------------------------------------------------------------------------------------------------------------------------------------------------------------------------------------------------------------------------------------------------------------------------------------------------------------------------------------------------------------------------------------------------------------------------------------------------------------------------------------------------------------------------------------------------------------------------------------------------------------------------------------------------------------------------------------------------------------------------------------------------------------------------------------------------------------------------------------------------------------------------------------------------------------------------------------------------------------------------------------------------------------------------------------------------------------------------------------------------------------------------------------------------------------------------------------------------------------------------------------------------------------------------------------------------------------------------------------|------------------------------------------------------------------------------------|
| <b>BARRIERS</b>                                      |                                                                                                                                                                                                                                                                                                                                                                                                                                                                                                                                                                                                                                                                                                                                                                                                                                                                                                                                                                                                                                                                                                                                                                                                                                                                                                                                                                                                                                                                                                                                                                                                                                                                                                                                                                                                                                                                                                                                 |                                                                                    |
| <b>Barriers to optimized patient prioritization</b>  | <ul style="list-style-type: none"> <li>• Factors that may hinder a patient with multiple chronic conditions from being able to participate in the act of prioritizing health conditions with his/her provider; this includes their decision making</li> <li>• Factors that may hinder a patient from taking part in the decision-making process in terms of health prioritization; engaging with health care workers in health prioritization</li> <li>• A patient’s family may have a greater influence on the decision than the patient’s own preferences.<sup>122</sup></li> <li>• Includes any barriers to patient-centred care</li> </ul>                                                                                                                                                                                                                                                                                                                                                                                                                                                                                                                                                                                                                                                                                                                                                                                                                                                                                                                                                                                                                                                                                                                                                                                                                                                                                  | <ul style="list-style-type: none"> <li>• 32,33,60,63,64,91,99, 122,123</li> </ul>  |
| <b>Barriers to optimized provider prioritization</b> | <ul style="list-style-type: none"> <li>• Factors that may hinder a provider from being able to participate in the act of prioritizing health conditions for a patient with multiple chronic conditions including decision making. This can also include health priorities addressed in the clinic setting</li> <li>• Factors that make it more difficult for health care providers to prioritize the treatment/management of a patient’s chronic conditions. For example, factors may include the competing demands of multiple chronic conditions, and challenges of balancing provider and patient priorities. <ul style="list-style-type: none"> <li>○ <i>Psychiatric disorder</i>: If the patient has a psychiatric disorder, then this may make it more difficult for providers to prioritize treatment/management of the chronic conditions.</li> </ul> </li> <li>• Patient-centered care is defined as GPs taking a broader view of the patient, incorporating non-medical or psychosocial issues. Patient-centered care is an over-riding principal for GPs in multimorbidity but trying to achieve this increases the complexity of care in some cases, and can lead the GP into additional conflict with specialist services or evidence-based medicine.<sup>58</sup></li> <li>• Factors that may hinder a provider from being able to apply evidence in the care of their patients.</li> <li>• Clinicians lack a systematic framework for determining patient preferences and synthesizing these preferences with existing evidence to set individual health priorities</li> <li>• Includes the barriers (i.e. time) related specifically to the implementation of training for providers (for example, GPs did not accept shared decision-making and prioritization training sessions of more than 30 min, for fear of organizational disruption , patient complaints, and financial loss).<sup>99</sup></li> </ul> | <ul style="list-style-type: none"> <li>• 25,37,58,60,63,99, 118,119,123</li> </ul> |
| <b>Barriers to shared decision making</b>            | <ul style="list-style-type: none"> <li>• Barriers that impede a collaborative process that allows patients and their providers to make health-care decisions together. The collaborative process takes into account the best clinical evidence available, as well as the patient's values and preferences.</li> <li>• For example, barriers to shared decision making patients often do not expect to share decisions, in particular older patients may find this SDM process difficult because it is unfamiliar and demanding.<sup>99</sup></li> </ul>                                                                                                                                                                                                                                                                                                                                                                                                                                                                                                                                                                                                                                                                                                                                                                                                                                                                                                                                                                                                                                                                                                                                                                                                                                                                                                                                                                         | <ul style="list-style-type: none"> <li>• 26,58,60,73,96,99, 123</li> </ul>         |

|                                                                 |                                                                                                                                                                                                                                                                                                                                                                                                                                                                                                                                                                                                                                                                                                                                                                                                                                                                                                                                                                                                                                                                                                                                                                                                                                                                                                                                                                                                                                                                                                                                                                                                                                                  |                                                                                                                                                                                                      |
|-----------------------------------------------------------------|--------------------------------------------------------------------------------------------------------------------------------------------------------------------------------------------------------------------------------------------------------------------------------------------------------------------------------------------------------------------------------------------------------------------------------------------------------------------------------------------------------------------------------------------------------------------------------------------------------------------------------------------------------------------------------------------------------------------------------------------------------------------------------------------------------------------------------------------------------------------------------------------------------------------------------------------------------------------------------------------------------------------------------------------------------------------------------------------------------------------------------------------------------------------------------------------------------------------------------------------------------------------------------------------------------------------------------------------------------------------------------------------------------------------------------------------------------------------------------------------------------------------------------------------------------------------------------------------------------------------------------------------------|------------------------------------------------------------------------------------------------------------------------------------------------------------------------------------------------------|
| <b>Barriers to the agreement between patients and providers</b> | <ul style="list-style-type: none"> <li>- Captures any excerpts about the dynamic between the patient and provider (whether that is agreement on prioritization, decision making)</li> <li>- Includes excerpts that mention <i>both</i> what patients and providers think.</li> </ul> <p><b>IN THE PRIORITIZATION OF CHRONIC DISEASES</b></p> <ul style="list-style-type: none"> <li>• Factors that decrease the level of agreement between patient and provider in terms of prioritization of health conditions including health care decision making. For example, when patients present with unrelated or discordant conditions, the patient and provider may disagree about which condition should be prioritized.<sup>72</sup></li> <li>• Include conflicting views/ranking? Between providers and patients of which diseases should be considered for treatment?<sup>32</sup></li> <li>• Factors that decrease the level of agreement between patient and provider, but not specifically about the prioritization of health conditions.</li> <li>• Factors that decrease the level of agreement between patients and provider, but not specifically about the prioritization of health conditions.<sup>115</sup> <ul style="list-style-type: none"> <li>○ For example, communication between the physician and patient can affect agreement. If the physician does not enact enough/ at all information-giving, counseling, quality of question asking and support, and participatory decision-making style (process of negotiation) during consultations with patients, then this many negatively affect agreement.</li> </ul> </li> </ul> | <p><b>PRIORITIZATION</b></p> <ul style="list-style-type: none"> <li>• 32,66,68,72,76,91,98,115</li> </ul> <p><b>HEALTH CARE DECISIONS</b></p> <ul style="list-style-type: none"> <li>• 93</li> </ul> |
| <b>Barriers to the patient-provider relationship</b>            | <ul style="list-style-type: none"> <li>• The communication barriers between patient and provider (includes factors that influence poor communication between patient and provider)</li> </ul>                                                                                                                                                                                                                                                                                                                                                                                                                                                                                                                                                                                                                                                                                                                                                                                                                                                                                                                                                                                                                                                                                                                                                                                                                                                                                                                                                                                                                                                    | <ul style="list-style-type: none"> <li>• 66,93,96</li> </ul>                                                                                                                                         |
| <b>FACILITATORS</b>                                             |                                                                                                                                                                                                                                                                                                                                                                                                                                                                                                                                                                                                                                                                                                                                                                                                                                                                                                                                                                                                                                                                                                                                                                                                                                                                                                                                                                                                                                                                                                                                                                                                                                                  |                                                                                                                                                                                                      |
| <b>Facilitators of optimized <u>patient</u> prioritization</b>  | <ul style="list-style-type: none"> <li>• Factors that may promote a patient from taking part in the decision-making process in terms of health prioritization;</li> <li>• Patients engaging with health care workers in health prioritization</li> <li>• What motivates patients to prioritize their conditions. For example, to cope with their health problems and stabilize their health.</li> <li>• The components of a clinical appointment/check-up that patients deem valuable and want to receive. For example, being given sufficient adequate medical information from the healthcare provider, particularly to empower patient decision making.</li> <li>• The components of a clinical appointment/checkup that patients deem valuable and want to receive. For example, being given sufficient adequate medical information from the healthcare provider, particularly to empower patient decision making</li> <li>• Includes any facilitators to patient-centred care.<sup>92</sup></li> </ul>                                                                                                                                                                                                                                                                                                                                                                                                                                                                                                                                                                                                                                     | <ul style="list-style-type: none"> <li>• 63,91,92</li> </ul>                                                                                                                                         |
| <b>Facilitators of optimized <u>provider</u> prioritization</b> | <ul style="list-style-type: none"> <li>• Factors that promote health care providers to prioritize multiple chronic conditions</li> <li>• Factors that promote health care providers to prioritize multiple chronic conditions</li> <li>• Factors that promote health care providers to work with other providers to prioritize multiple chronic conditions. For example, use of an electronic integrated medical records system may facilitate communication and care coordination across providers.<sup>62</sup></li> </ul>                                                                                                                                                                                                                                                                                                                                                                                                                                                                                                                                                                                                                                                                                                                                                                                                                                                                                                                                                                                                                                                                                                                     | <ul style="list-style-type: none"> <li>• 25,62,88,92,98,118,119, 123</li> </ul>                                                                                                                      |

|                                                                     |                                                                                                                                                                                                                                                                                                                                                                                                                                                                                                                                                                                                                                                                                                                                                                                                                                                                                                                                                                                                                                                                                                                                                                                                                                                                                                                                                                                                                                                                                                                                                             |                                                                                                                                                                                                        |
|---------------------------------------------------------------------|-------------------------------------------------------------------------------------------------------------------------------------------------------------------------------------------------------------------------------------------------------------------------------------------------------------------------------------------------------------------------------------------------------------------------------------------------------------------------------------------------------------------------------------------------------------------------------------------------------------------------------------------------------------------------------------------------------------------------------------------------------------------------------------------------------------------------------------------------------------------------------------------------------------------------------------------------------------------------------------------------------------------------------------------------------------------------------------------------------------------------------------------------------------------------------------------------------------------------------------------------------------------------------------------------------------------------------------------------------------------------------------------------------------------------------------------------------------------------------------------------------------------------------------------------------------|--------------------------------------------------------------------------------------------------------------------------------------------------------------------------------------------------------|
|                                                                     | <ul style="list-style-type: none"> <li>Specifically, how patient-centered communication impacts patients in terms of knowledge, expectations, participation in treatment process and providers in terms of quality of care.</li> </ul>                                                                                                                                                                                                                                                                                                                                                                                                                                                                                                                                                                                                                                                                                                                                                                                                                                                                                                                                                                                                                                                                                                                                                                                                                                                                                                                      |                                                                                                                                                                                                        |
| <b>Facilitators of the patient-provider relationship</b>            | <ul style="list-style-type: none"> <li>The concept where physician “accompany the patient, which may contribute to a stable patient-physician relationship. “The physicians saw themselves as doctors who accompany these patients rather than doctors who heal them. This leads to an emphasis on ‘little improvements.’ [...]The physicians stressed that accompanying the patients and witnessing their improvements contributed to a stable doctor-patient-relationship.”<sup>66</sup></li> <li>Includes communication facilitators between patient and provider (the factors that influence good communication between patient and provider)</li> </ul>                                                                                                                                                                                                                                                                                                                                                                                                                                                                                                                                                                                                                                                                                                                                                                                                                                                                                                | <ul style="list-style-type: none"> <li>26,66,92</li> </ul>                                                                                                                                             |
| <b>Facilitators of shared decision making</b>                       | <p><b>GENERAL</b></p> <ul style="list-style-type: none"> <li>Factors that facilitate the collaborative process that allows patients and their providers to make health-care decisions together based on available evidence and clarification of patient preferences.</li> <li>For example: <ul style="list-style-type: none"> <li>Agreement is a prerequisite of shared decision making and can be achieved using a patient-centred approach.<sup>99</sup></li> <li>Sharing personal experiences, and facilitating concise and clear discussions with patients on the interplay between chronic diseases were strategies used by GPs to facilitate SDM.<sup>58</sup></li> </ul> </li> </ul> <p><b>IMPLEMENTATION</b></p> <ul style="list-style-type: none"> <li>Factors that facilitate the implementation of processes, tools, or skills that encourage or foster shared and equitable decision-making between patient and doctor, with decisions based on available evidence and clarification of patient preferences</li> <li>For example: <ul style="list-style-type: none"> <li>Communication training for GPs can help them facilitate SDM.<sup>99</sup></li> <li>If the healthcare provider considers the patient also as an expert in, and partner in the management of, their condition(s), and respects the patient’s opinions.<sup>26</sup></li> <li>Involving patient perspectives and preferences in the patient-provider decision-making process by exploring and mutually explaining each other's ideas<sup>57</sup>.</li> </ul> </li> </ul> | <p><b>GENERAL:</b></p> <ul style="list-style-type: none"> <li>26,43,57,58,68,73,75,88,96,98,99,122</li> </ul> <p><b>IMPLEMENTATION:</b></p> <ul style="list-style-type: none"> <li>26,98,99</li> </ul> |
| <b>Facilitators of the agreement between patients and providers</b> | <ul style="list-style-type: none"> <li>- Captures anything about the dynamic between the patient and provider (whether that agreement on prioritization, decision making)</li> <li>- Includes excerpts that mention <i>both</i> what patients and providers think.</li> </ul> <p><b>IN THE PRIORITIZATION OF CHRONIC DISEASE</b></p> <ul style="list-style-type: none"> <li>Factors that increase the level of agreement between patients and providers in terms of prioritization of health conditions.</li> <li>For example, the agreement between patients and providers was higher when <ul style="list-style-type: none"> <li>Patients have fewer symptoms.<sup>32</sup></li> <li>The provider was male.<sup>32</sup></li> </ul> </li> </ul> <p><b>IN HEALTH CARE DECISIONS</b></p> <ul style="list-style-type: none"> <li>Factors that increase the level of agreement between patients and providers, but not specifically about the prioritization of health conditions.</li> </ul>                                                                                                                                                                                                                                                                                                                                                                                                                                                                                                                                                                 | <p><b>PRIORITIZATION</b></p> <ul style="list-style-type: none"> <li>25,32,68,73,91,93,124</li> </ul> <p><b>HEALTH CARE DECISIONS</b></p> <ul style="list-style-type: none"> <li>66,115</li> </ul>      |

|                                                                                |                                                                                                                                                                                                                                                                                                                                                                                                                                                                                                                                                                                                                                                                                                                                                                                                                                                                                                                                                                                                                                                                                                                                                                                                                                                                                                                                                                                                                                                                                                                                                                                                                                                                                                                                                                                                                                                                                                                                                                                                                                                                                                                                                                                 |                                                                                               |
|--------------------------------------------------------------------------------|---------------------------------------------------------------------------------------------------------------------------------------------------------------------------------------------------------------------------------------------------------------------------------------------------------------------------------------------------------------------------------------------------------------------------------------------------------------------------------------------------------------------------------------------------------------------------------------------------------------------------------------------------------------------------------------------------------------------------------------------------------------------------------------------------------------------------------------------------------------------------------------------------------------------------------------------------------------------------------------------------------------------------------------------------------------------------------------------------------------------------------------------------------------------------------------------------------------------------------------------------------------------------------------------------------------------------------------------------------------------------------------------------------------------------------------------------------------------------------------------------------------------------------------------------------------------------------------------------------------------------------------------------------------------------------------------------------------------------------------------------------------------------------------------------------------------------------------------------------------------------------------------------------------------------------------------------------------------------------------------------------------------------------------------------------------------------------------------------------------------------------------------------------------------------------|-----------------------------------------------------------------------------------------------|
|                                                                                | <ul style="list-style-type: none"> <li>For example: Having a process of negotiation may ensure collaboration and agreement between patients and their primary care physicians.<sup>115</sup></li> </ul>                                                                                                                                                                                                                                                                                                                                                                                                                                                                                                                                                                                                                                                                                                                                                                                                                                                                                                                                                                                                                                                                                                                                                                                                                                                                                                                                                                                                                                                                                                                                                                                                                                                                                                                                                                                                                                                                                                                                                                         |                                                                                               |
| <b>(Neutral) Factors</b>                                                       |                                                                                                                                                                                                                                                                                                                                                                                                                                                                                                                                                                                                                                                                                                                                                                                                                                                                                                                                                                                                                                                                                                                                                                                                                                                                                                                                                                                                                                                                                                                                                                                                                                                                                                                                                                                                                                                                                                                                                                                                                                                                                                                                                                                 |                                                                                               |
| <b><u>Process of shared decision making between providers and patients</u></b> | The process of shared and equitable decision-making process between patient and doctor, with decisions based on available evidence and clarification of patient preferences                                                                                                                                                                                                                                                                                                                                                                                                                                                                                                                                                                                                                                                                                                                                                                                                                                                                                                                                                                                                                                                                                                                                                                                                                                                                                                                                                                                                                                                                                                                                                                                                                                                                                                                                                                                                                                                                                                                                                                                                     | <ul style="list-style-type: none"> <li>25,75,99,118,125</li> </ul>                            |
| <b><u>Patients' process of prioritizing multiple chronic conditions</u></b>    | <ul style="list-style-type: none"> <li>The process used by patients to prioritize their multiple chronic conditions including their decision making and management (anything about <i>how</i> patients prioritize)</li> <li>Includes any “rules of thumb” patients use to prioritize their conditions i.e. pain, functional limitations, new conditions that change up your prioritization</li> <li>This is different than facilitators or barriers to patients’ prioritization of chronic conditions. It spells out the process (steps) that patients go through as well as the factors that they take into account when prioritizing their chronic conditions.</li> <li>The steps and considerations taken by patients when prioritizing their chronic conditions. For example, Morris and colleagues<sup>93</sup> discuss when and why patients reprioritize conditions, and how the new ordering of conditions is determined.<sup>93</sup></li> <li>Simply a listing of patients’ priorities such as specific diseases or getting informed about their conditions</li> <li>Factors that may promote or hinder a patient from taking part in the decision-making process in terms of health prioritization; engaging with health care workers in health prioritization<br/>For example, patients tended to follow GP’s recommendation if the issue was purely medical; however, if the issue had a direct impact on their daily lives (e.g. changes at home), the patients themselves wanted to make the decision.<sup>25</sup></li> <li>Includes factors that influence prioritization that are not related to specific barriers (challenges) or facilitators, such as the internal processes they use to prioritize multiple chronic diseases</li> <li>Includes factors that may influence or drive patients’ prioritization such as such as pain, fatigue, shortness of breath, or dizziness and have a great impact on quality of life and life satisfaction and thus—likely—on patient preferences. For example: Patients’ prioritization and needs were affected by psychosocial factors, previous experiences and the patient's’ expectation.<sup>60</sup></li> </ul> | <ul style="list-style-type: none"> <li>25,32,56,60,63,64,66,68,76,87,91,93,122,125</li> </ul> |
| <b><u>Providers' process of prioritizing multiple chronic conditions</u></b>   | <ul style="list-style-type: none"> <li>The process used by providers to prioritize their multiple chronic conditions including their decision making and management</li> <li>For example: <ul style="list-style-type: none"> <li>Providers’ priorities were determined by medical aspects of the diseases such as the disease severity and prognosis.<sup>25</sup></li> <li>When providers did not feel in charge of a problem or were not aware of suitable treatments, they rated the problem as unimportant.<sup>25</sup></li> <li>Instead of symptomatic conditions, providers may focus on the long-term health consequences of asymptomatic hypertension or uncontrolled diabetes.<sup>32</sup></li> </ul> </li> </ul>                                                                                                                                                                                                                                                                                                                                                                                                                                                                                                                                                                                                                                                                                                                                                                                                                                                                                                                                                                                                                                                                                                                                                                                                                                                                                                                                                                                                                                                    | <ul style="list-style-type: none"> <li>25,32,57,63,65,66,68,76,96,98,119,125</li> </ul>       |



### Appendix 3

#### Context-Mechanism-Outcome (CMO) configurations of Programme theory 1 (Care coordination interventions)

#### General CMO configurations to explain Program Theory 1

|                                                                                                                                                                                                                                                                                                                                                                                                                                                                                                 |                                                                                                                                                                                                                                                                                                                                                                                                                                                                                                                                                                                                                                                                                                                                                                                                                                                                                                                                                                                                                                                                                                                                                                                                                                                                                                                                                                                                                                                                                                                                  |
|-------------------------------------------------------------------------------------------------------------------------------------------------------------------------------------------------------------------------------------------------------------------------------------------------------------------------------------------------------------------------------------------------------------------------------------------------------------------------------------------------|----------------------------------------------------------------------------------------------------------------------------------------------------------------------------------------------------------------------------------------------------------------------------------------------------------------------------------------------------------------------------------------------------------------------------------------------------------------------------------------------------------------------------------------------------------------------------------------------------------------------------------------------------------------------------------------------------------------------------------------------------------------------------------------------------------------------------------------------------------------------------------------------------------------------------------------------------------------------------------------------------------------------------------------------------------------------------------------------------------------------------------------------------------------------------------------------------------------------------------------------------------------------------------------------------------------------------------------------------------------------------------------------------------------------------------------------------------------------------------------------------------------------------------|
| <p><b>*Care coordination Interventions</b> in primary care are effective for older adults with multimorbidity because they represent a structured approach to holistic care. They provide a comprehensive and coordinated approach to multimorbidity management by addressing multiple conditions (through interdisciplinary teams and/or multidisciplinary disease management), providing specific mechanisms for communication, and establishing formal roles for providers and patients.</p> |                                                                                                                                                                                                                                                                                                                                                                                                                                                                                                                                                                                                                                                                                                                                                                                                                                                                                                                                                                                                                                                                                                                                                                                                                                                                                                                                                                                                                                                                                                                                  |
| <p><b>Team-based approaches</b></p>                                                                                                                                                                                                                                                                                                                                                                                                                                                             | <p>Team-based approaches can lead to a range of outcomes, such as evidence-based care solutions for multiple conditions in parallel (not in tandem) [M]<sup>38</sup>, a wider range of services [O], more holistic care [O], higher quality of care [O], reduce scheduling complications [O2]<sup>88</sup> and increase the flexibility and responsiveness of the team [O3]<sup>45</sup>. These outcomes are most likely to occur when team members have mutual respect and confidence [M2]<sup>45</sup>, are highly trained and skilled (fast learners, effective communicators, motivated, capable, well organized) members [M]<sup>53</sup> who understand and accept each other's roles [M3]<sup>53</sup>, provide opportunities<sup>38,88</sup> and time<sup>53</sup> to share information [M]<sup>81</sup>, and are willing to collaborate on patient care [M5]<sup>38,45,53,88</sup>. Successful teams [O4] also require that patients and team members be educated about how the team functions and the role of each member [M]. The contexts in which these mechanisms are triggered include teams that have dedicated members who provide additional support to patients<sup>38,53</sup> or providers<sup>81</sup>. Team members receive official training on the model<sup>38,53,81</sup>, including training on team skills<sup>81</sup>. Organizations have a robust and well-functioning communication system<sup>38,45</sup>. Many of the team-based approaches under study were Canadian<sup>45,53,81</sup>.</p> |
| <p><b>Disease management</b></p>                                                                                                                                                                                                                                                                                                                                                                                                                                                                | <p>Disease management for multimorbidity care consists of the use of a number of discrete intervention strategies with the desired outcome of achieving systematized care. These include: checklists, follow up timetables<sup>45,103,110</sup>, and treatment targets [M]<sup>45</sup>. Together, these intervention strategies appear to make explicit the roles, expectations, and responsibilities of the health care professionals involved [C], enabling staff to become aware of their roles, expectations, and responsibilities [M] leading to a shared philosophy and platform for care [O]<sup>45, 103</sup>. This also permits the formalization of decisions (about which health care professionals have agreed upon) preferably in discussion with patients and their family and/or friends [O]<sup>45</sup></p>                                                                                                                                                                                                                                                                                                                                                                                                                                                                                                                                                                                                                                                                                                    |
| <p><b>Case management</b></p>                                                                                                                                                                                                                                                                                                                                                                                                                                                                   | <p>Case management intervention strategies are appropriate for managing multimorbidity because in collaborative care interventions where there may be diverse and many providers involved in a patient's care [C], a case manager functions as a conduit of information [M] to help improve coordination and information sharing from the patient to providers as well as between providers [O]<sup>53</sup>.</p> <p>When improved coordination and information sharing occurs [C] and case managers are in regular contact with the patient [C]<sup>80</sup>, are the primary point of contact and coordinator of care [C]<sup>103</sup> and provide individualized attention [C]<sup>9</sup> and information [C]<sup>80</sup> to patients, patients</p>                                                                                                                                                                                                                                                                                                                                                                                                                                                                                                                                                                                                                                                                                                                                                                        |

|                                                                                                                                                                                                                                                                                                                                                               |                                                                                                                                                                                                                                                                                                                                                                                                                                                                                                                                                                                                                                                                                                                                                                                                           |
|---------------------------------------------------------------------------------------------------------------------------------------------------------------------------------------------------------------------------------------------------------------------------------------------------------------------------------------------------------------|-----------------------------------------------------------------------------------------------------------------------------------------------------------------------------------------------------------------------------------------------------------------------------------------------------------------------------------------------------------------------------------------------------------------------------------------------------------------------------------------------------------------------------------------------------------------------------------------------------------------------------------------------------------------------------------------------------------------------------------------------------------------------------------------------------------|
|                                                                                                                                                                                                                                                                                                                                                               | <p>perceive that their care is continuous [M]<sup>78,79</sup> and coordinated [M]<sup>79</sup> and as a result know who is 'in charge' and who to turn to when then have a problem [O].</p> <p>When patients know who is 'in charge' and who to turn to when then have a problem [C] helps patients to feel safer [M] and trust [M] of their case managers over time<sup>79</sup> resulting in the building of relationships that are more likely be based on confidentiality [O]<sup>79,80</sup>, and mutual equality [O]<sup>80</sup></p> <p>These types pf relationships appear to be the basis of some of the further 'downstream' outcomes that are found with case management, such as helping patients to develop the skills and confidence they need to manage their health [O]<sup>78</sup>.</p> |
| <p><b>Education</b> was a component in 83% of the chronic disease management interventions identified in our systematic review. Education for patients is often a component of care coordination interventions<sup>15,45,103</sup>, and can be more effective [O] when combined with active monitoring [M] and provided by a pharmacist<sup>45</sup> [C].</p> |                                                                                                                                                                                                                                                                                                                                                                                                                                                                                                                                                                                                                                                                                                                                                                                                           |
| <b>Health education</b>                                                                                                                                                                                                                                                                                                                                       | <p>Health education is often combined with self-management support<sup>94,103,104</sup>, which is more effective for lifestyle modification than education alone<sup>94</sup>. Patients receive education about their multimorbidity through numerous formats, including: video streaming<sup>50</sup>, in-hospital education<sup>31</sup> and the internet<sup>51</sup>. Video streaming may be good for homebound patients<sup>50</sup>, whereas in-hospital education may be more effective for those who might become motivated to change their lifestyle after a hospitalization event<sup>31</sup>. Patients with multiple chronic conditions use the internet, but there are few websites that address multiple conditions in an integrated fashion<sup>51</sup>.</p>                              |
| <b>Health coaching</b>                                                                                                                                                                                                                                                                                                                                        | <p>Health coaching (helping patients to gain the knowledge, skills and confidence to become active participants in their care aimed at reaching their self-identified health goals)<sup>27</sup>. Health coaches (who could also be case managers) strengthen patient self-management by improving patient self-efficacy by listening and applying patients' challenges and health goals to customize action planning<sup>27</sup>. This allows patients to develop the coping and problem solving skills that support self-management<sup>27,94</sup>.</p>                                                                                                                                                                                                                                               |
| <b>Web 2.0 technology</b>                                                                                                                                                                                                                                                                                                                                     | <p>Web 2.0 technology (web use that involves more active participation, creation and sharing of information such as through social networking) are examples of interventions captured in our realist review that incorporate education. Web 2.0 technologies may support patient self-efficacy by providing relevant information, and opportunities to learn from other web users. For example, delivering online instructional units (developed and delivered by a multidisciplinary team of healthcare providers), and self-management training workshops staffed by peer moderators (i.e. individuals living with similar chronic conditions as the user)<sup>95</sup>.</p>                                                                                                                            |

\*This narrative provides only a broad explanation of Programme theory 1, greater detail that explains the outcomes that<sup>81</sup> may be achieved by the different intervention strategies used in the care coordination.

## Details of CMO configurations to explain Program Theory 1

| Coordination of care element                                                                                      | Definition                                                                                                                                                                                                                                                                                                                                                                                                                                                                                                                                                  | Explanation of determinants via Context [C]-Mechanism[M]-Outcome[O] configurations                                                                                                                                                                                                                                                                                                                                                                                                                                                                                                                                                                                                                                                                                                                                                                                                                                                                                                                                                                                                                                                                                                                                                                                                                                                                                                                                                                                                                                                                                                                                                                                                     |
|-------------------------------------------------------------------------------------------------------------------|-------------------------------------------------------------------------------------------------------------------------------------------------------------------------------------------------------------------------------------------------------------------------------------------------------------------------------------------------------------------------------------------------------------------------------------------------------------------------------------------------------------------------------------------------------------|----------------------------------------------------------------------------------------------------------------------------------------------------------------------------------------------------------------------------------------------------------------------------------------------------------------------------------------------------------------------------------------------------------------------------------------------------------------------------------------------------------------------------------------------------------------------------------------------------------------------------------------------------------------------------------------------------------------------------------------------------------------------------------------------------------------------------------------------------------------------------------------------------------------------------------------------------------------------------------------------------------------------------------------------------------------------------------------------------------------------------------------------------------------------------------------------------------------------------------------------------------------------------------------------------------------------------------------------------------------------------------------------------------------------------------------------------------------------------------------------------------------------------------------------------------------------------------------------------------------------------------------------------------------------------------------|
| <p><b>Teams</b><br/><i>The right care at the right time</i></p>                                                   | <p>Highly trained clinicians<sup>53</sup> who provide holistic and coordinated care, often, but not always, from the same physical location<sup>88</sup>. Teams aim to provide time for the patient to discuss all of their concerns, prevent care overlap and gaps<sup>80</sup>, and reduce scheduling complications<sup>88</sup></p> <p>Patients are taught about their conditions, medications, and how lifestyle affects their health, and given information on health promotion or counseling services and other supporting services<sup>44</sup>.</p> | <p><b>Why Team-based approaches are appropriate for multimorbidity:</b> Team-based approaches are appropriate for managing multimorbidity [O1] because they can ideally provide evidence-based care solutions for multiple conditions in parallel (not in tandem) [M1]<sup>38</sup>. Collaborative care teams can provide a wider range of services [O1], more holistic care [O2] and higher quality of care [O3] through interdisciplinary communication and collaboration [M1]<sup>38,81</sup>, and access to specialists [M2]<sup>53</sup>.</p> <p><b>Facilitators of successful teams:</b> Successful multidisciplinary teams [O1] are those which comprise highly trained and skilled (fast learners, effective communicators, motivated, capable, well organized) members [M1]<sup>53</sup> who have mutual respect and confidence [M2]<sup>45</sup>, understand and accept each other's roles [M3]<sup>53</sup>, provide opportunities<sup>38,88</sup> and time<sup>53</sup> to share information [M4]<sup>81</sup>, and collaborate on patient care [M5]<sup>38,45,53,88</sup>. These facilitators can also reduce scheduling complications [O2]<sup>88</sup> and increase the flexibility and responsiveness of the team [O3]<sup>45</sup>. Successful teams [O4] also require that patients and team members be educated about how the team functions and the role of each member [M1]. The use of peer moderators (i.e., individuals also living with a chronic condition who are trained to lead self-management training programs) [M1] can facilitate intervention learning activities such as behavior change, medication management, and disease information [O5].</p> |
| <p><b>Disease management</b><br/><i>Systematized care (all providers are on the same evidence-based page)</i></p> | <p>Disease management programs follow a “script” of how to provide effective (often evidence-based) patient care. Often care protocols or intervention plans define the division of tasks and support the follow-up and coordination of action<sup>103,110</sup>, and help sustain the development of a philosophy of common care<sup>45</sup>.</p> <p>Patients may be educated about the disease management system so they know what to expect, and often provided with education and resources about how to properly self-manage their conditions.</p>    | <p><b>Why Disease management approaches are appropriate for multimorbidity:</b> Disease management strategies are appropriate for managing multimorbidity [O1] because they can systematically apply evidence-based care to populations of patients [M1] thereby making it more appropriate for managing conditions and combinations of conditions where evidence-based care exists. Care can be systematized [O2] through checklists [M1], follow-up timetables [M2], and treatment targets [M3]<sup>45,103,110</sup>.</p> <p><b>Facilitators of disease management:</b> Disease management approaches define the division of tasks [M1]<sup>45</sup>, support the follow-up and coordination of action [M2]<sup>45,103</sup>, and help sustain the development of a philosophy<sup>45</sup> and shared platform<sup>103</sup> of care [M3], therefore permitting the formalization of decisions (about which health care professionals have agreed upon) preferably in discussion with patients and their family and/or friends [O]<sup>45</sup>.</p>                                                                                                                                                                                                                                                                                                                                                                                                                                                                                                                                                                                                                                |
| <p><b>Case management</b></p>                                                                                     | <p>Case managers are trained health care professionals who are the contact person between a patient and involved providers. They know how to facilitate</p>                                                                                                                                                                                                                                                                                                                                                                                                 | <p><b>Why case management approaches are appropriate for multimorbidity:</b> Case management are appropriate for managing multimorbidity [O1] because in collaborative care interventions where there may be diverse and many providers involved in a patient's care [C1], a case manager acts as a</p>                                                                                                                                                                                                                                                                                                                                                                                                                                                                                                                                                                                                                                                                                                                                                                                                                                                                                                                                                                                                                                                                                                                                                                                                                                                                                                                                                                                |

|                                                             |                                                                                                                                                                                                                                                                                                                                                   |                                                                                                                                                                                                                                                                                                                                                                                                                                                                                                                                                                                                                                                                                                                                                                                                                                                                                                                                                                                                                                                                                                                                                                                                                                                                                                          |
|-------------------------------------------------------------|---------------------------------------------------------------------------------------------------------------------------------------------------------------------------------------------------------------------------------------------------------------------------------------------------------------------------------------------------|----------------------------------------------------------------------------------------------------------------------------------------------------------------------------------------------------------------------------------------------------------------------------------------------------------------------------------------------------------------------------------------------------------------------------------------------------------------------------------------------------------------------------------------------------------------------------------------------------------------------------------------------------------------------------------------------------------------------------------------------------------------------------------------------------------------------------------------------------------------------------------------------------------------------------------------------------------------------------------------------------------------------------------------------------------------------------------------------------------------------------------------------------------------------------------------------------------------------------------------------------------------------------------------------------------|
| <p><i>Case managers are the primary conduit of care</i></p> | <p>care planning and shared decision making; and how to anticipate and address barriers (e.g. to treatment adherence).<br/>Case managers work closely with patients and their family/caregivers to provide information (e.g., about the health system or care), and to help them develop the skills and knowledge needed for self-management.</p> | <p>conduit of information [M1] to help improve coordination and information sharing from the patient to providers as well as between providers [O]<sup>53</sup>.</p> <p><b>Facilitators of case management:</b> Case management strategies work [O1] because case managers are in regular contact with the patient [M1]<sup>80</sup>, and provide individualized attention [M2]<sup>9</sup> and information [M3]<sup>80</sup> to patients.</p> <p>For patients with extensive and diverse care teams [C1], case management can ensure that care is continuous [O2]<sup>78,79</sup> and coordinated [O3]<sup>79</sup> by enhancing the communication between patients and providers [M1] and by being the primary point of contact and coordinator of care [M2]<sup>103</sup>.</p> <p>Patients also feel safer [O4] when knowing that their case managers are monitoring their care [M1], and they trust their case managers over time [O5]<sup>79</sup> because of regular contact [M1]<sup>80</sup>, and through a relationship of confidentiality [M2]<sup>79,80</sup>, and mutual equality [M3]<sup>80</sup>.</p> <p>By engaging family/caregivers in proactive care [M1], case managers also help patients develop the skills and confidence they need to manage their health [O6]<sup>78</sup>.</p> |
|-------------------------------------------------------------|---------------------------------------------------------------------------------------------------------------------------------------------------------------------------------------------------------------------------------------------------------------------------------------------------------------------------------------------------|----------------------------------------------------------------------------------------------------------------------------------------------------------------------------------------------------------------------------------------------------------------------------------------------------------------------------------------------------------------------------------------------------------------------------------------------------------------------------------------------------------------------------------------------------------------------------------------------------------------------------------------------------------------------------------------------------------------------------------------------------------------------------------------------------------------------------------------------------------------------------------------------------------------------------------------------------------------------------------------------------------------------------------------------------------------------------------------------------------------------------------------------------------------------------------------------------------------------------------------------------------------------------------------------------------|

## Appendix 4

### Context-Mechanism-Outcome (CMO) configurations of programme theory 2 (Health prioritization in multimorbidity management)

#### General CMO configurations to explain Program Theory 2

|                                                                                                                                                                                                                                                                                                                                                                                                                                                                                                                                                                                                                                                                                                                                                                                                                                                                                                                                                                                   |                                                                                                                                                                                                                                                                                                                                                                                                                                                                                                                                                                                                                                                                                                                                                                                                                                                                                                                                                                                                                                                                                                                                                                                                                                                                                                                                                                                                                                                                                                                                                                                                                                                                                                                                                                                                                          |
|-----------------------------------------------------------------------------------------------------------------------------------------------------------------------------------------------------------------------------------------------------------------------------------------------------------------------------------------------------------------------------------------------------------------------------------------------------------------------------------------------------------------------------------------------------------------------------------------------------------------------------------------------------------------------------------------------------------------------------------------------------------------------------------------------------------------------------------------------------------------------------------------------------------------------------------------------------------------------------------|--------------------------------------------------------------------------------------------------------------------------------------------------------------------------------------------------------------------------------------------------------------------------------------------------------------------------------------------------------------------------------------------------------------------------------------------------------------------------------------------------------------------------------------------------------------------------------------------------------------------------------------------------------------------------------------------------------------------------------------------------------------------------------------------------------------------------------------------------------------------------------------------------------------------------------------------------------------------------------------------------------------------------------------------------------------------------------------------------------------------------------------------------------------------------------------------------------------------------------------------------------------------------------------------------------------------------------------------------------------------------------------------------------------------------------------------------------------------------------------------------------------------------------------------------------------------------------------------------------------------------------------------------------------------------------------------------------------------------------------------------------------------------------------------------------------------------|
| <p>Multimorbidity management is confusing for patients and overwhelming for providers due to the heterogeneous nature of multimorbidity<sup>102</sup>, disease and treatment interactions and possible conflicts<sup>57,92</sup>, and the difficulty of attributing symptoms to conditions<sup>57</sup>. Health prioritization is an important function of the management of multiple chronic diseases in primary care settings because the evidence base is most often single-disease focused and multimorbidity can create a cognitive and emotional overload in patients and health care providers. A common intervention strategy to multimorbidity management is to focus on one condition at a time<sup>64</sup>, using a priority setting approach. Prioritizing one condition over the others (for a specified period of time, or until particular outcomes are achieved), allows patients<sup>91</sup> and providers<sup>64</sup> to focus their attention and care.</p> |                                                                                                                                                                                                                                                                                                                                                                                                                                                                                                                                                                                                                                                                                                                                                                                                                                                                                                                                                                                                                                                                                                                                                                                                                                                                                                                                                                                                                                                                                                                                                                                                                                                                                                                                                                                                                          |
| <p><b>Patients’ approach to prioritization</b></p>                                                                                                                                                                                                                                                                                                                                                                                                                                                                                                                                                                                                                                                                                                                                                                                                                                                                                                                                | <p>Patients with multiple chronic conditions can experience a range of symptoms [C]. These symptoms trigger cognitive and emotional overload [M] for patients and as a result, they resort to prioritization [O].</p> <p>The prioritization process is influenced by the nature of the symptoms. Patients prioritize their condition [O] by making decisions based on their judgments of the symptoms they experience most need attention [M]. Symptoms which threaten their participation in social activities<sup>25,63,76</sup> [C], limit their independence<sup>25,91</sup> [C] and they believe might have potentially severe long-term consequences if not acted upon<sup>63,91</sup> [C] - examples of these symptoms include pain, fatigue and dizziness.</p> <p>Those diseases that patients prioritize and seek help for [O] are the ones that patients believe are causing with these symptoms<sup>32,56,63,66,68,125</sup> [C] because they do not feel that they have the capacity to engage in self-management behaviors associated with the disease [M].</p> <p>Multimorbidity can have cascading effects. Patients may find it challenging to determine which chronic disease is causing a particular symptom [O] because conditions may share similar symptoms<sup>72</sup> [M], the treatment of one condition may aggravate the other<sup>61,62,90,91</sup> [M] or cause other antagonistic effects<sup>64,90,91</sup> [M]. The diagnosis of a new condition added to an existing one [C] may impede self-management because information about the new condition adds uncertainty<sup>87</sup> [M]. Patients who are able to identify the main illness that causes the most concern [C], are able to keep their symptoms under control and return to an acceptable way of life<sup>87</sup> [O].</p> |
| <p><b>Providers’ approach to prioritization</b></p>                                                                                                                                                                                                                                                                                                                                                                                                                                                                                                                                                                                                                                                                                                                                                                                                                                                                                                                               | <p>Patients with multiple chronic conditions can present to health care providers with a wide range of symptoms [C]. Dealing with these symptoms trigger cognitive and emotional overload [M] for the providers and as a result, they resort to prioritization [O].</p> <p>The prioritization process used by providers is influenced by the nature of the symptoms. Providers tend to prioritize conditions [O] based on their judgments about the prognosis or severity of the condition <sup>25,57,66,68,76,125</sup> These judgments are influenced by their knowledge or evidence <sup>124,125</sup> about the which conditions are likely to have more serious outcomes [C], whether the patient is likely to benefit from treatment<sup>57,114,124,125</sup> [C] and conditions they feel they are most likely to be able to address (e.g. physical vs. emotional)<sup>32,124</sup>.</p> <p>Providers also tend to prioritize physical conditions over emotional or other conditions [C] (partly because) they consider the interrelatedness of the conditions and any potential cascading effects when prioritizing<sup>65</sup>[M].</p>                                                                                                                                                                                                                                                                                                                                                                                                                                                                                                                                                                                                                                                                         |

| <b>Associated CMO configurations related to multimorbidity management:</b> We derived explanations of multimorbidity management in the context of primary care from the perspective of patients, providers and the system. |                                                                                                                                                                                                                                                                                                                                                                                                                                                                                                                                                                                                                                                                                                                                                                                                                                                                                                                                                                                                                                                                                                                                                                                                                                                                                                                                                                                                                                                                                                                                                                                                                                                   |
|----------------------------------------------------------------------------------------------------------------------------------------------------------------------------------------------------------------------------|---------------------------------------------------------------------------------------------------------------------------------------------------------------------------------------------------------------------------------------------------------------------------------------------------------------------------------------------------------------------------------------------------------------------------------------------------------------------------------------------------------------------------------------------------------------------------------------------------------------------------------------------------------------------------------------------------------------------------------------------------------------------------------------------------------------------------------------------------------------------------------------------------------------------------------------------------------------------------------------------------------------------------------------------------------------------------------------------------------------------------------------------------------------------------------------------------------------------------------------------------------------------------------------------------------------------------------------------------------------------------------------------------------------------------------------------------------------------------------------------------------------------------------------------------------------------------------------------------------------------------------------------------|
| <b>Patient perspective</b>                                                                                                                                                                                                 | The <u>mental health needs of patients add to management challenges and</u> interfere with patient self-care <sup>57</sup> . Some mental health patients with poor communication[C] receive less intensive mental health treatment <sup>59</sup> [O] because providers sometimes ignored or normalized [M] their symptoms <sup>38</sup> . A patient-centred approach, which takes into account the patient's psychosocial realities (housing, relationships, income) <sup>92</sup> [C] is more likely to meet the needs of complex patients with multimorbidity <sup>82,117</sup> [O].                                                                                                                                                                                                                                                                                                                                                                                                                                                                                                                                                                                                                                                                                                                                                                                                                                                                                                                                                                                                                                                            |
| <b>Provider perspective</b>                                                                                                                                                                                                | <u>Primary care clinicians face a number of challenges when managing patients with multimorbidity.</u> In the contexts of inadequate decision support systems <sup>35</sup> , evidence to support their clinical decision making <sup>60</sup> , or care protocols or intervention plans that are too rigid <sup>45</sup> , they may feel that they lack the skills and/or confidence <sup>33</sup> [M] to simultaneously understand patient subjective experience and biochemical processes of diseases <sup>26</sup> needed to appropriately manage these patients [O]. Another challenge is that most often, only single disease guidelines are available to manage multimorbidity [C], so clinicians are forced to modify them in anticipation of adverse effects <sup>89</sup> [M] or use common sense approaches [M] (to complement the limitations of their application <sup>98</sup> ) leading to variations in 'adherence' to single disease guidelines. In the context of few existing multimorbidity guidelines and resulting clinical uncertainty or contradictory information, a promising intervention strategy from our included articles was shared decision making between patients and clinicians, which was described as a useful, and possibly a necessary tool for making individualized treatment decisions <sup>58, 118</sup> .                                                                                                                                                                                                                                                                                            |
| <b>System perspective</b>                                                                                                                                                                                                  | Multimorbidity can create challenges in the relationship between primary and secondary care. When patients are given more certainty than a primary care practitioner would have provided [C], the primary care practitioner's view of specialists can be negatively affected <sup>68</sup> [O]. There is often poor communication between primary and secondary care providers <sup>61,84</sup> , which makes it difficult to coordinate care <sup>58</sup> . From the system perspective, primary care may be the optimal context to deliver multimorbidity care because it is accessible to most patients <sup>33</sup> , and tend to be viewed as efficient <sup>33</sup> , equitable <sup>33</sup> , and having wide reach <sup>33</sup> and good continuity of care <sup>33,56-58</sup> . However, the infrastructure of primary care settings may not be optimally designed to handle multimorbidity [C] and can lead to fragmentation of care [O]. This is because multimorbidity demands the involvement of multiple providers <sup>80</sup> [M], multiple care locations <sup>92</sup> [M], and extra consultation and provider time <sup>32,33,35,38,65,72,102,105</sup> [M], which can lead to less opportunities for preventative and psychiatric care [O], less care for concurrent conditions <sup>59</sup> [O], inadequate time for building patient-provider relationships <sup>63</sup> [O], and poor follow-up <sup>35</sup> [O]. Increasing or adjusting consultation time for multimorbidity management <sup>40,72,75,82</sup> and complexity of illness <sup>58</sup> may provide opportunities to address these challenges. |

### Details of CMO configurations to explain Program Theory 2

| <b>Theme</b>                       | <b>Explanations using Context [C]-Mechanism[M]-Outcome[O] configurations</b>                                                                                                                                                                                                                             |
|------------------------------------|----------------------------------------------------------------------------------------------------------------------------------------------------------------------------------------------------------------------------------------------------------------------------------------------------------|
| <b>Patient perspective</b>         |                                                                                                                                                                                                                                                                                                          |
| <i>Disease and patient factors</i> | <b>Barrier:</b> Prioritization in itself is challenging for patients [O1], because of treatment side effects [M1] <sup>64</sup> , and the patient needs to manage one condition at a time, which may be in conflict with other condition treatment plans that they ought to be having [M1] <sup>64</sup> |

|                                          |                                                                                                                                                                                                                                                                                                                                                                                                                                                                                                                                                                                                                                                                                                                                                                                                                                                                                                                                                                                                                                                                                                                                                 |
|------------------------------------------|-------------------------------------------------------------------------------------------------------------------------------------------------------------------------------------------------------------------------------------------------------------------------------------------------------------------------------------------------------------------------------------------------------------------------------------------------------------------------------------------------------------------------------------------------------------------------------------------------------------------------------------------------------------------------------------------------------------------------------------------------------------------------------------------------------------------------------------------------------------------------------------------------------------------------------------------------------------------------------------------------------------------------------------------------------------------------------------------------------------------------------------------------|
|                                          | <p><b>Facilitator:</b> Patients with multimorbidity optimally prioritize their health conditions [O1] by being actively involved in setting their goals and priorities [M1]<sup>92</sup>, and by sharing their feelings (with providers) about their illness(es) and its effects on their functioning [M2]<sup>92</sup> by stating their expectations to providers of medical care [M3]<sup>92</sup>.</p>                                                                                                                                                                                                                                                                                                                                                                                                                                                                                                                                                                                                                                                                                                                                       |
| <i>Provider factors</i>                  | <p><b>Barrier:</b> Patient prioritization can be hindered for patients [O1] by receiving confusing [M1] and conflicting [M2] treatment recommendations from physicians<sup>64</sup>, and by lack of awareness/information regarding the seriousness of a condition [M3]<sup>32</sup>.</p> <p><b>Facilitator:</b> Strategies to help patients prioritize their conditions [O1] are to have reassurance that their available treatments work [M2]<sup>64</sup>, and that their condition is being monitored regularly [M3]<sup>64</sup>.</p>                                                                                                                                                                                                                                                                                                                                                                                                                                                                                                                                                                                                      |
| <i>Contextual factors</i>                | <p><b>Barrier:</b> There is currently no framework to assist patients in determining preference and synthesizing these preferences with existing evidence to set individual health priorities and decisions [M]<sup>123</sup></p> <p><b>Facilitator:</b> Strategies to help patients prioritize their conditions [O1] are to use home-based self-management programs [M1]<sup>91</sup>, and by having access to clinicians who are knowledgeable about their health conditions [M4]<sup>64</sup>.</p>                                                                                                                                                                                                                                                                                                                                                                                                                                                                                                                                                                                                                                           |
| <b>Provider perspective</b>              |                                                                                                                                                                                                                                                                                                                                                                                                                                                                                                                                                                                                                                                                                                                                                                                                                                                                                                                                                                                                                                                                                                                                                 |
| <i>Disease and patient level factors</i> | <p><b>Barrier:</b> Prioritization is difficult for physicians [O1] when aspects of patient health such as when conditions or symptoms (e.g., pain) are difficult to treat and impactful [M1]<sup>118</sup>, when somatic and mental disorders are combined [M2]<sup>60</sup>, and when there is no specific diagnosis or the presentation is an asymptomatic condition [M3]<sup>119</sup>.</p> <p><b>Barrier:</b> The evidence for treating multiple chronic conditions itself [C1] may be problematic [O1] because it may conflict with patients' values, preferences and needs [M1], be insufficient or uncertain regarding effectiveness [M2], or in the case of health economics data, be difficult to interpret and use [M3]<sup>119</sup>.</p> <p><b>Facilitator:</b> Providers find it easier to prioritize uncomplicated conditions which are responsive to treatment [O2] because they are able to predict patient benefits [M1] and determine if treatment is cost-effective [M2]<sup>119</sup></p>                                                                                                                                   |
| <i>Provider factors</i>                  | <p><b>Barrier:</b> Prioritization is difficult [O2] when physicians do not know about a patient's psychosocial factors [M1], history [M2] or management expectations [M3]<sup>60</sup>. Additionally, physicians themselves may not understand [M4] or be able to adhere to patient priorities [M5]<sup>123</sup>, and may not have in person-centered communication [M2]<sup>25</sup> or shared decision making [M3]<sup>99</sup> skills.</p> <p><b>Facilitator:</b> Facilitators of optimal provider prioritization [O1] are good listening and communication with patients [M1]<sup>25</sup>, which also ensures that treatment is individualized to each patient [O2]<sup>123</sup>; that priority setting is based on patient's perceptions, concerns, and expectation [O3]<sup>25</sup>; that the prioritization has a positive impact on functions of daily living [O3]<sup>92</sup>, and based on what the patient has identified as their own priorities [O4]<sup>25</sup>. This individualized care for the patient [O2] should be balanced with clinical knowledge<sup>123</sup> and provider self-reflection [M1]<sup>25</sup>.</p> |
| <i>Contextual factors</i>                | <p><b>Barrier:</b> Optimized provider prioritization is challenging [O1] because it takes an investment in time [M1]<sup>25,60,99</sup> which doctors worry might disrupt clinic flow [O2], result in financial loss [O3], and trigger patient complaints [O4]<sup>99</sup>.</p> <p><b>Facilitator:</b> Physicians can improve the process of prioritizing chronic conditions with the help of specialized multimorbidity clinics [M1] and multimorbidity software programs [M2]<sup>25</sup></p>                                                                                                                                                                                                                                                                                                                                                                                                                                                                                                                                                                                                                                               |

## Appendix 5

### Context-Mechanism-Outcome (CMO) configurations of programme theory 3 (Patient self-management in multimorbidity)

#### General CMO configurations to explain Program Theory 3

| <b>Patient self-management in multimorbidity:</b> We derived explanations via CMO configurations to explain self-management in multimorbidity (Appendix 6). |                                                                                                                                                                                                                                                                                                                                                                                                                                                                                                                                                                                                                                                                                                                                                                                                                                                                                                                                                                                                                                                                                                                                                                                                                                                                                                                                              |
|-------------------------------------------------------------------------------------------------------------------------------------------------------------|----------------------------------------------------------------------------------------------------------------------------------------------------------------------------------------------------------------------------------------------------------------------------------------------------------------------------------------------------------------------------------------------------------------------------------------------------------------------------------------------------------------------------------------------------------------------------------------------------------------------------------------------------------------------------------------------------------------------------------------------------------------------------------------------------------------------------------------------------------------------------------------------------------------------------------------------------------------------------------------------------------------------------------------------------------------------------------------------------------------------------------------------------------------------------------------------------------------------------------------------------------------------------------------------------------------------------------------------|
| <b>Burden of multimorbidity management</b>                                                                                                                  | Multimorbidity is reported as a burden by patients [O] because of the cognitive and emotional overload [M] required for lifestyle changes [C] <sup>87</sup> (which can be inconsistent or conflicting [C] <sup>25</sup> ), as well as the volume of information and recommendations provided [C] <sup>51,74</sup> (which are often confusing and conflicting <sup>43,91-93</sup> [C]). Adherence to recommended treatment is challenging for patients [O] because: 1) self-management regimens have been designed to fit their condition rather than their health priorities [C], lifestyle [C], available resources [C] <sup>89,94</sup> ; 2) unwieldy medications (too many, taken often, and difficult to keep track of)[C] <sup>15,51</sup> ; 3) having to follow a required diet and exercise routine [C] <sup>36,51,91</sup> ; 4) having to see multiple providers[C] <sup>71</sup> ; 5) medication mismanagement[C] <sup>71</sup> ; 6) not knowing how to respond to adverse drug effects[C] <sup>15,71</sup> ; and 7) communication barriers due to linguistic and cultural diversity[C] <sup>71</sup> . These multiple contexts likely trigger cognitive and emotional overload [M].                                                                                                                                                |
| <b>Influence of cognition and mental health on self-management</b>                                                                                          | Self-management is particularly challenging [O] for older adults who have impaired cognition <sup>89</sup> [C]or suffer from anxiety <sup>90</sup> [C] in addition to chronic conditions [C] as these contexts interact to increase their perceive an increase in illness burden <sup>63</sup> . If the additional condition is depression [C]: older adults may choose not to do anything (such as take medication) [O] because they consider it a normal part of aging [M] or; are reluctant to seek treatment [O] due to stigma <sup>30</sup> [M]. Depression, as a context, appears to also trigger other mechanisms that reduce their ability to self-manage chronic conditions <sup>30-32,59,64,87,91</sup> [O]. The mechanism include reduced patient motivation, energy and self-efficacy, feelings of being overwhelmed, hopeless <sup>31</sup> or stressed <sup>87</sup> . There appears to be a number of feedback loops because illness burden can interfere with people’s ability to engage in health promotion such as exercise, which can result in negative consequences such as weight gain <sup>87</sup> , reduced quality of life, functional decline or ability to work. These in turn, can impact mood, social networks, and self-management behaviours <sup>62</sup> .                                                 |
| <b>Influence of resource constraints on self-management</b>                                                                                                 | Self-management in multimorbidity is influenced by the lack of resources available to many older adults to help manage this burden <sup>64</sup> including the lack of finances <sup>62,91</sup> , social supports <sup>23,62,88,89,91</sup> or transportation <sup>91</sup> , as well as the influence of low health literacy <sup>29</sup> or skills to manage and coordinate care and adverse effects <sup>43,90</sup> . Another challenge is that even if resources and programs exist, older adults may not be aware of them <sup>62</sup> . Promoting contact with consumer organizations or support groups <sup>26,71</sup> and having peer support <sup>31</sup> may address these challenges. Older adults are interested in self-management tools that provide health condition information <sup>51</sup> ; share, coordinate and synthesize information with and between providers; and connect them with other patients <sup>51</sup> . Physicians can support patient self-management through tailoring of information to the stage of the patient’s condition and their adaptation to it <sup>26</sup> , as well as through good interaction with patients <sup>93</sup> , providing information <sup>93</sup> (including patients’ particular language <sup>71</sup> ), and a collaborative approach to care <sup>115</sup> . |



### Details of CMO configurations to explain Program Theory 3

| Theme                                                                                                                                                                             | Sub-theme                                                                        | Explanations using Context [C]-Mechanism[M]-Outcome[O] configurations                                                                                                                                                                                                                                                                                                                                                                                                                                                                                                                                                                                                                                                                                                                                                                                                                                                                                                                                                                                                                                                                                                                                                                                                                                                                                                                                                                                                                                                                                                                                                                                                                                                                                                                                                                                                                                                                                                                                                                                                                                                                                                                                   |
|-----------------------------------------------------------------------------------------------------------------------------------------------------------------------------------|----------------------------------------------------------------------------------|---------------------------------------------------------------------------------------------------------------------------------------------------------------------------------------------------------------------------------------------------------------------------------------------------------------------------------------------------------------------------------------------------------------------------------------------------------------------------------------------------------------------------------------------------------------------------------------------------------------------------------------------------------------------------------------------------------------------------------------------------------------------------------------------------------------------------------------------------------------------------------------------------------------------------------------------------------------------------------------------------------------------------------------------------------------------------------------------------------------------------------------------------------------------------------------------------------------------------------------------------------------------------------------------------------------------------------------------------------------------------------------------------------------------------------------------------------------------------------------------------------------------------------------------------------------------------------------------------------------------------------------------------------------------------------------------------------------------------------------------------------------------------------------------------------------------------------------------------------------------------------------------------------------------------------------------------------------------------------------------------------------------------------------------------------------------------------------------------------------------------------------------------------------------------------------------------------|
| <b>Patient perspective</b>                                                                                                                                                        |                                                                                  |                                                                                                                                                                                                                                                                                                                                                                                                                                                                                                                                                                                                                                                                                                                                                                                                                                                                                                                                                                                                                                                                                                                                                                                                                                                                                                                                                                                                                                                                                                                                                                                                                                                                                                                                                                                                                                                                                                                                                                                                                                                                                                                                                                                                         |
| <p>Managing multimorbidity is <b>difficult to do for patients</b> due to the volume, complexity, and confusing/ contradictory nature of what is required for self-management.</p> | <p><i>Burden of self-managing multimorbidity</i></p>                             | <p><b>Barrier:</b> The burden of self-management is high for people with multimorbidity [O1], and can impair their quality of life life<sup>92</sup> [O2] due to the required lifestyle changes<sup>87</sup>, which are sometimes inconsistent or conflicting [M1]<sup>25</sup>; the provision of the sheer volume of information provided<sup>51,74</sup> [M2], and the often confusing and conflicting information provided about treatment recommendations [M3]<sup>43,91-93</sup> (including conflicting dietary advice for different conditions<sup>93</sup> from a multitude of healthcare providers). In fact, self-management becomes more challenging as the number of providers increases [M5]<sup>74</sup> along with the numerous appointments required [M6]<sup>15,56</sup>.</p> <p><b>Facilitator:</b> Having multiple conditions itself can promote self-management [O] because patients may have already developed skills such as self-monitoring and self-advocacy [M1]<sup>63,90</sup>, and they may be more motivated because of the heightened risk [M2]<sup>90</sup>.</p> <p><b>Facilitator:</b> When patients can establish a cognitive link between existing self-management practices [M1]<sup>90,91,93</sup>, and making this link intuitively and over time<sup>93</sup>, they can become more successful at self-management [O1].</p>                                                                                                                                                                                                                                                                                                                                                                                                                                                                                                                                                                                                                                                                                                                                                                                                                                        |
|                                                                                                                                                                                   | <p><i>Adherence to self-management regimens (treatments and medications)</i></p> | <p><b>Barrier:</b> Successful self-management [O1] has been judged by the ability of patients to adhere to prescribed treatment [M1]. However, adherence to recommended treatment has not worked for patients [O2] because self-management regimens have been designed to fit their condition rather than their health priorities, lifestyle, and available resources [M1]<sup>89,94</sup>. Other factors are unwieldy medications (too many, taken often, and difficult to keep track of) [M2]<sup>15,51</sup>, having to follow a required diet and exercise routine [M3]<sup>36,51,91</sup>, having to see multiple providers [M4]<sup>71</sup>, medication mismanagement [M5]<sup>71</sup>, not knowing how to respond to adverse drug effects (especially for those who take multiple medications) [M6]<sup>15,71</sup>, and information communication barriers such as linguistic and cultural diversity [M7]<sup>71</sup></p> <p><b>Barrier:</b> Patients do not take prescribed medications [O3] for a variety of reasons: they do not like taking medications [M1]<sup>85,91</sup>, they believe that the medication will negatively affect their health [M2] or is inappropriate for their underlying condition [M3]<sup>91</sup>, they do not believe the medication is necessary [M4]<sup>91</sup>, they experience undesirable side effects from the medication [M5]<sup>15,91</sup>, the medication information is difficult to read or understand [M6]<sup>29</sup>, the regimen is too complicated to follow (particularly in culturally and linguistically diverse populations) [M7]<sup>32,51,56,71,92</sup>, the bottles are difficult to open [M8]<sup>29</sup>, and they forget to take their medication [M9]<sup>29</sup>. Although not being able to understand and receive information can lead to medication noncompliance [O4]<sup>90</sup> the provision of better and clearer information about medications alone is unlikely to improve adherence [M1]<sup>29</sup>.</p> <p><b>Barrier:</b> Medication noncompliance can also result if taking multiple drugs (polypharmacy), which can lead to drug interactions<sup>124</sup> and adverse events [M2]<sup>101</sup>.</p> |

|                                                                                                                                                                                                                        |                                                                        |                                                                                                                                                                                                                                                                                                                                                                                                                                                                                                                                                                                                                                                                                                                                                                                                                                                                                                                                                                                                                                                                                                                                                                                                                                                                                                                                                                                                                                                                                                                                                                                                                                                                                                                                                                                                                                                                                                            |
|------------------------------------------------------------------------------------------------------------------------------------------------------------------------------------------------------------------------|------------------------------------------------------------------------|------------------------------------------------------------------------------------------------------------------------------------------------------------------------------------------------------------------------------------------------------------------------------------------------------------------------------------------------------------------------------------------------------------------------------------------------------------------------------------------------------------------------------------------------------------------------------------------------------------------------------------------------------------------------------------------------------------------------------------------------------------------------------------------------------------------------------------------------------------------------------------------------------------------------------------------------------------------------------------------------------------------------------------------------------------------------------------------------------------------------------------------------------------------------------------------------------------------------------------------------------------------------------------------------------------------------------------------------------------------------------------------------------------------------------------------------------------------------------------------------------------------------------------------------------------------------------------------------------------------------------------------------------------------------------------------------------------------------------------------------------------------------------------------------------------------------------------------------------------------------------------------------------------|
|                                                                                                                                                                                                                        |                                                                        | <p><b>Facilitator:</b> People with multimorbidity can learn how to take medication strategically to achieve a balance between benefits and side-effects [O4], often based on years of experience of self-managing often antagonistic symptoms and competing goals [M1]<sup>85</sup>. Medication adherence [O5] can be facilitated through automated reminder systems [M1]<sup>47,56</sup>, and switching to medications with modified release formulations [M2]<sup>56</sup>.</p> <p><b>Facilitator:</b> Medication adherence [O5] is linked to a person's self-efficacy (the confidence or ability to feel "I can do that") [M3]<sup>71</sup>, which can improve clinical outcomes [O6]<sup>47</sup>. Some patients with multiple chronic conditions view their medication as a way of gaining control over their illness management [O7] by establishing routines for taking medications [M1] and seeing it as an opportunity to become more active self-managers [M2]. These patients consider medication management as positive [O8]<sup>93</sup>.</p>                                                                                                                                                                                                                                                                                                                                                                                                                                                                                                                                                                                                                                                                                                                                                                                                                                                 |
| <p><b>Cascading effects of multimorbidity:</b> having, experiencing, and managing multimorbidity can cause additional barriers to self-management through <b>antagonistic</b> effects, both physical and emotional</p> | <p>The influence of chronic disease interrelatedness</p>               | <p><b>Barrier:</b> Patients with multimorbidity may find it challenging to determine which chronic disease is causing a particular symptom [O1] because chronic diseases may share similar symptoms<sup>72</sup> [M1], the treatment of one condition can also aggravate another condition<sup>61,62,90,91</sup> [M2] or cause other antagonistic effects<sup>64,90,91</sup> (or the fear that it might cause these effects<sup>85</sup>) [M3] – these are major barriers to self-management, which can lead to medication non-adherence [O2]<sup>62,91</sup> or low self-management in other lifestyle areas [O3]<sup>91</sup>.</p> <p><b>Barrier:</b> The diagnosis of an additional condition to an already existing one may also impede self-management [O4] because the new information for the 2<sup>nd</sup> condition adds uncertainty about what to do<sup>87</sup> [M1].</p> <p><b>Facilitator:</b> Patients who are able to identify the main illness that was causing them the most concern [M1] and keep it stable [M2] helps keep their symptoms under control [O1] and return to an acceptable way of life within the limitations of their illness [O2]<sup>87</sup>.</p>                                                                                                                                                                                                                                                                                                                                                                                                                                                                                                                                                                                                                                                                                                                   |
|                                                                                                                                                                                                                        | <p>The influence of mental and emotional health on self-management</p> | <p><b>Barrier:</b> Multimorbidity management challenges are exacerbated [O1] in patients with mental and emotional health problems (low cognition<sup>89</sup>, anxiety<sup>90</sup>) because the limitations of one condition may impact the ability to look after another condition [M1]<sup>87,93</sup>. The ability to self-manage for these people are influenced by the interaction of conditions [M2], which may also contribute to a perceived increase in illness burden [O2]<sup>63</sup>. It is a cascading effect because if illness burden prevents exercise [M3], this can cause an increase in weight<sup>87</sup> [M3], and reduce quality of life, relationships, and ability to work [O3], which in turn can impact mood, social networks, and self-management behaviours<sup>62</sup> [O4]. In patients who have large discrepancies between current and past physical and cognitive functional abilities and activities (i.e., previous energy, endurance, strength, memory, ability to concentrate) [M1] may be unable to reconcile the difference and embrace self-management [O3]<sup>87</sup>.</p> <p><b>Barrier:</b> Cascading effects on self-management ability are also seen in multimorbidity patients with depression. In older adults, depression may be a barrier to effective self-management [O1] or a result of previous failures with self-management<sup>65</sup> [O2] because they may choose not to treat depression because they consider it a normal part of aging [M1], do not want to take medications [M2], or are reluctant to seek treatment due to stigma [M3]<sup>30</sup>. Additionally, depression can reduce patient motivation, energy and self-efficacy [M4], causing them to feel overwhelmed [M5], hopeless [M6]<sup>31</sup> or stressed [M7]<sup>87</sup>, which in turn can reduce their ability to self-manage<sup>30-32,59,64,87,91</sup>.</p> |

|                                                     |                   |                                                                                                                                                                                                                                                                                                                                                                                                                                                                                                                                                                                                                                                                                                                                                                                                                                                                                                                                                                                                                                                                                                                                                                                                                                                                                                                                                                                                                                                                                                                                                                                                                                                                                                                                                                                                                                                                                        |
|-----------------------------------------------------|-------------------|----------------------------------------------------------------------------------------------------------------------------------------------------------------------------------------------------------------------------------------------------------------------------------------------------------------------------------------------------------------------------------------------------------------------------------------------------------------------------------------------------------------------------------------------------------------------------------------------------------------------------------------------------------------------------------------------------------------------------------------------------------------------------------------------------------------------------------------------------------------------------------------------------------------------------------------------------------------------------------------------------------------------------------------------------------------------------------------------------------------------------------------------------------------------------------------------------------------------------------------------------------------------------------------------------------------------------------------------------------------------------------------------------------------------------------------------------------------------------------------------------------------------------------------------------------------------------------------------------------------------------------------------------------------------------------------------------------------------------------------------------------------------------------------------------------------------------------------------------------------------------------------|
|                                                     |                   | <p>Chronic pain<sup>32</sup> [C2] experienced by older adults with multimorbidity works similarly in that it can be disruptive to self-management [O3] because it can reduce motivation [M1] and cause significant emotional distress [M2].</p> <p><b>Facilitator:</b> Factors that influence better self-care [O1] and better experience of illness [O2] of patients with multimorbidity are learning how to manage their emotions through exercise [M1]<sup>85</sup>, spending time being outdoors [M2]<sup>85</sup>, having a change of scenery [M3]<sup>85</sup>, reframing their situation [M4]<sup>90</sup>, prioritizing certain conditions [M5]<sup>90</sup>, staying positive [M6]<sup>87</sup>, doing their best [M7]<sup>87</sup> and to consider mindfulness-based stress reduction [M8]<sup>94</sup>.</p>                                                                                                                                                                                                                                                                                                                                                                                                                                                                                                                                                                                                                                                                                                                                                                                                                                                                                                                                                                                                                                                                 |
|                                                     | Lack of resources | <p><b>Barrier:</b> Self-management of patients with multimorbidity [O1] is influenced by the lack of resources to manage the burden of multimorbidity<sup>64</sup> such as insufficient knowledge and information [M1]<sup>87,91,95</sup>, low health literacy [M2]<sup>29</sup>; low skills to manage and coordinate care and side effects [M3]<sup>43,90</sup>; and lack of finances [M4]<sup>62,91</sup>, social support [M5]<sup>23,62,88,89,91</sup>, or access to transportation [M6]<sup>91</sup>. Caregivers [C] may find self-care especially difficult [O2] because of the time [M1] and finances [M2] they are already using to care for others<sup>62</sup>. Even if resources and programs exist to help patients self-manage multimorbidity, they may not be aware of them [M1]<sup>62</sup>.</p> <p><b>Barrier:</b> Self-management regimens can impede one's ability to work. Although continuing to work for those with multimorbidity may be difficult, it provides financial stability, health insurance and identity to patients<sup>62</sup>.</p> <p><b>Facilitator:</b> Self-management can be improved for patients with multimorbidity [O1] if they have contact with consumer organizations or support groups [M1]<sup>26,71</sup> and peer support [M2]<sup>31</sup>.</p> <p><b>Facilitator:</b> Patients are interested in self-management tools [O1] that provide health condition information [M1]<sup>51</sup>; can share, coordinate and synthesize information with and between providers [M2]; help them access new research findings [M3], connect them with other patients [M4], help them sort health records [M5], consult with remote specialists [M6], and coordinate with local providers [M7]<sup>51</sup>. Telehome care systems can improve patient self-management [O1] through the provision of health information [M8]<sup>47</sup>.</p> |
| <b>Provider perspective</b>                         |                   |                                                                                                                                                                                                                                                                                                                                                                                                                                                                                                                                                                                                                                                                                                                                                                                                                                                                                                                                                                                                                                                                                                                                                                                                                                                                                                                                                                                                                                                                                                                                                                                                                                                                                                                                                                                                                                                                                        |
| <b>Communication between providers and patients</b> |                   | <p><b>Barrier:</b> Providers (particularly specialists) [C] can themselves be a barrier to patient self-management [O1]<sup>61</sup>. Patients may be dissatisfied with the way the provider communicates [M1]<sup>43,91</sup>, and family physicians (who are the primary contacts for patients) may fail to provide valuable information about self-management resources such as patient advocacy and self-help groups and other resources [M3]<sup>26</sup>.</p> <p><b>Facilitator:</b> Physicians can support patient self-management [O1] and have a positive impact on patient self-management [O2] through tailoring information-giving to the stage of the patient's condition and their adaptation to it [M1]<sup>26</sup>, through good interaction with patients [M1]<sup>93</sup>, information provision [M2]<sup>93</sup> (including information in the patient's own language and adequate time to review it<sup>71</sup>), a collaborative approach to care [M3]<sup>115</sup>, encouraging active engagement in self-management [M4]<sup>71</sup>, motivating patients and providing a behavioural model [M5]<sup>31</sup>, and empowering patients by providing them with skills and confidence to manage their own conditions [M6]<sup>94</sup>.</p>                                                                                                                                                                                                                                                                                                                                                                                                                                                                                                                                                                                                                 |

## Appendix 6

### Details of Context-Mechanism-Outcome configurations to explain multimorbidity management overall

| Theme                                                    | Explanations using Context [C]-Mechanism[M]-Outcome[O] configurations                                                                                                                                                                                                                                                                                                                                                                                                                                                                                                                                                                                                                                                                                                                                                                                                                                                                                                                                                                                                                                                                                                                                                                                                                                                                                                                                                                                                                                                                      |
|----------------------------------------------------------|--------------------------------------------------------------------------------------------------------------------------------------------------------------------------------------------------------------------------------------------------------------------------------------------------------------------------------------------------------------------------------------------------------------------------------------------------------------------------------------------------------------------------------------------------------------------------------------------------------------------------------------------------------------------------------------------------------------------------------------------------------------------------------------------------------------------------------------------------------------------------------------------------------------------------------------------------------------------------------------------------------------------------------------------------------------------------------------------------------------------------------------------------------------------------------------------------------------------------------------------------------------------------------------------------------------------------------------------------------------------------------------------------------------------------------------------------------------------------------------------------------------------------------------------|
| <b>Patient perspective</b>                               |                                                                                                                                                                                                                                                                                                                                                                                                                                                                                                                                                                                                                                                                                                                                                                                                                                                                                                                                                                                                                                                                                                                                                                                                                                                                                                                                                                                                                                                                                                                                            |
| <i>Confusing for patients</i>                            | <p><b>Barrier:</b> Multimorbidity management in primary care [C] is confusing to patients [O2]<sup>120</sup> due to the heterogeneous nature of multimorbidity [M1]<sup>102</sup>, disease and treatment interactions and possible conflicts [M2]<sup>57,92</sup>, and the difficulty of attributing symptoms to conditions [M3]<sup>57</sup>.</p> <p><b>Facilitator:</b> Supporting patient self-management is a critical aspect of multimorbidity care<sup>37,85</sup> and to achieve optimal health outcomes. These include medication support<sup>30,55</sup> [M1], motivational enhancement<sup>62,43</sup> [M2], and education [M3], which is a key aspect of optimal medication [O2]<sup>29</sup> and disease management [O3], particularly for people with arthritis and depression [C2]<sup>104</sup>.</p> <p><b>Facilitator:</b> A patient-centred approach, that takes into account the patient's psychosocial realities (housing, relationships, income, etc.) [M1]<sup>92</sup> is more likely to meet the needs [O1] of complex patients with multimorbidity [C1]<sup>82,117</sup>. Patient-centred approaches [M2] can help patients adopt healthy lifestyles [O2] if they have adequate adoption readiness [M2], and target additional behaviours once change in one behaviour is achieved [M3]<sup>120</sup> 23. For complex patients [C1], patient-centered care may be promoted [O4] by enhanced communication [M3] although this may or may not improve disease-specific self-care and outcomes [O5]<sup>105</sup></p> |
| <i>Mental health needs of patients add to complexity</i> | <p><b>Barrier:</b> In primary care, mental health needs of patients [M1] in the context of multimorbidity management can be a barrier to patient self-care [O1]<sup>57</sup>, can create communication issues with providers (i.e., patient complaints may not be clear) [O2]<sup>57</sup>, are often ignored or normalized since physical health issues take precedent [O3]<sup>38</sup>, and can lead to patients receiving less intensive treatment [O4]<sup>59</sup>.</p>                                                                                                                                                                                                                                                                                                                                                                                                                                                                                                                                                                                                                                                                                                                                                                                                                                                                                                                                                                                                                                                              |
| <b>Provider perspective</b>                              |                                                                                                                                                                                                                                                                                                                                                                                                                                                                                                                                                                                                                                                                                                                                                                                                                                                                                                                                                                                                                                                                                                                                                                                                                                                                                                                                                                                                                                                                                                                                            |
| <i>Overwhelming for providers</i>                        | <p><b>Barrier:</b> Multimorbidity management in primary care [C] may be overwhelming for providers [O1]<sup>56</sup> due to the heterogeneous nature of multimorbidity [M1]<sup>102</sup>, disease and treatment interactions and possible conflicts [M2]<sup>57,92</sup>, and the difficulty of attributing symptoms to conditions [M3]<sup>57</sup>.</p>                                                                                                                                                                                                                                                                                                                                                                                                                                                                                                                                                                                                                                                                                                                                                                                                                                                                                                                                                                                                                                                                                                                                                                                 |
| <i>Not prepared for managing multimorbidity</i>          | <p><b>Barrier:</b> Primary care clinicians are inadequately prepared for multimorbidity [O1] due to their lack of skills and confidence in addressing multimorbidity [M1]<sup>33</sup>, not having adequate decision support systems [M2]<sup>35</sup> or evidence [M3]<sup>60</sup> to support their clinical decision making, and having care protocols or intervention plans that are too rigid [M4]<sup>45</sup>. These make it difficult for primary care physicians to simultaneously understanding patient subjective experience and biochemical processes of chronic conditions [O2]<sup>26</sup>.</p> <p><b>Facilitator:</b> Many general practitioners have identified the need for guidelines that address multimorbidity<sup>75</sup>. When only single disease guidelines are available to manage multimorbidity [C1], clinicians sometimes modify guidelines [M1] in anticipation of adverse effects<sup>89</sup>, use common sense to complement the limitations of their application [M2]<sup>98</sup>, and work with patients to help them understand guidelines [M3] so they can make informed treatment decisions [O1]<sup>98</sup>. Collaboration with patients is needed [M4] when the single disease guidelines being used are contradictory [C2]<sup>58</sup>. In</p>                                                                                                                                                                                                                                               |

|                                                                                                                   |                                                                                                                                                                                                                                                                                                                                                                                                                                                                                                                                                                                                                                                                                                                                                                                                                                                                                                                                                                                                                                                                                                                                                                                                                                                                                                                                                                                                                                                                                                                                                                                                                                                                                                                                                                             |
|-------------------------------------------------------------------------------------------------------------------|-----------------------------------------------------------------------------------------------------------------------------------------------------------------------------------------------------------------------------------------------------------------------------------------------------------------------------------------------------------------------------------------------------------------------------------------------------------------------------------------------------------------------------------------------------------------------------------------------------------------------------------------------------------------------------------------------------------------------------------------------------------------------------------------------------------------------------------------------------------------------------------------------------------------------------------------------------------------------------------------------------------------------------------------------------------------------------------------------------------------------------------------------------------------------------------------------------------------------------------------------------------------------------------------------------------------------------------------------------------------------------------------------------------------------------------------------------------------------------------------------------------------------------------------------------------------------------------------------------------------------------------------------------------------------------------------------------------------------------------------------------------------------------|
|                                                                                                                   | situations where few guidelines exist and there is significant clinical uncertainty [C3], shared decision making between patients and clinicians is a useful, and possibly a necessary tool [M5] for making individualized treatment decisions [O2] <sup>118</sup>                                                                                                                                                                                                                                                                                                                                                                                                                                                                                                                                                                                                                                                                                                                                                                                                                                                                                                                                                                                                                                                                                                                                                                                                                                                                                                                                                                                                                                                                                                          |
| <i>Multimorbidity can worsen the relationship between primary and secondary care (including care transitions)</i> | <p><b>Barrier:</b> An effective relationship between primary and secondary care (and in consequence, the transition between primary and specialist care) is difficult [O] for patients with multimorbidity because: patients are susceptible to exaggerated instructions by specialists and overly influenced by diagnostics [M1]<sup>68</sup>, specialists do not acknowledge primary care [M2]<sup>61,84</sup>, and there is often poor communication between primary and secondary care providers [M3]<sup>61,84</sup>. This is compounded by the emphasis each specialist puts on 'their' guideline, which makes it difficult for primary care providers to coordinate care [M4]<sup>58</sup>. The lack of cooperation between primary and secondary care [O2] also makes it difficult for patients [O3] because their needs are often episodic requiring both primary and specialist care either simultaneously or in succession [M4]<sup>36</sup>.</p> <p><b>Facilitator:</b> Patient-primary care physician concordance on health-related attitudes and perceptions [M1] appears to be a powerful predictor of primary care physician implementation of [O1] and patient adherence to [O2] to recommended geriatric health care<sup>115</sup>. This implies that specialist education regarding recommended care should be directed at both primary care physicians and their patients<sup>109</sup>. Additionally, trusting relationships between primary care physicians and specialists [M2] promotes collective and harmonized approaches to care [O3]<sup>45</sup></p>                                                                                                                                                                                          |
| <b>System perspective</b>                                                                                         |                                                                                                                                                                                                                                                                                                                                                                                                                                                                                                                                                                                                                                                                                                                                                                                                                                                                                                                                                                                                                                                                                                                                                                                                                                                                                                                                                                                                                                                                                                                                                                                                                                                                                                                                                                             |
| <i>Primary care is the optimal context to deliver multimorbidity care, but it is not designed to handle it</i>    | <p><b>Facilitator:</b> Primary care may be the optimal context to deliver multimorbidity care [C] because it is accessible to most patients [M1]<sup>33</sup>, efficient [M2]<sup>33</sup>, equitable [M3]<sup>33</sup>, has reach [M4]<sup>33</sup>, has good continuity of care [M4]<sup>33,56-58</sup>, and primary care providers generally know their patients well [M5]<sup>33,56,57</sup> and they have a generalist and patient-centred approach to care [M6]<sup>56</sup>. Relational continuity [M7] in primary care helps providers better understand patient needs [O1] and enhances multimorbidity care [O2]<sup>58</sup>.</p> <p><b>Barrier:</b> Primary care is not designed to handle multimorbidity [O1] because it demands extra consultation and provider time [M1]<sup>32,33,35,38,65,72,102,105</sup>. This in turn can lead to inadequate care patients (i.e., less preventative care, psychiatric care, less care for concurrent conditions) [O2]<sup>59</sup>, inadequate time for building patient-provider relationships [O3]<sup>63</sup>, the complexities of primary care clinics requiring to schedule multiple appointments for multiple issues [O3]<sup>65</sup>, poor follow-up practices by clinicians [O4]<sup>35</sup>, and the tendency to maintain the status quo for complex patients rather than changing the management plan [O5]<sup>73</sup>.</p> <p><b>Facilitator:</b> Increasing consultation time for multimorbidity [M1]<sup>40,72,75,82</sup>, adjusting consultation time to complexity of illness [M2]<sup>58</sup>, and allowing for time to discuss health issues [M3]<sup>72</sup> and build a relationship [M4]<sup>58</sup> have all been identified as opportunities to improve multimorbidity management [O].</p> |
| <i>Multimorbidity can lead to fragmentation of care</i>                                                           | <p><b>Barrier:</b> Multimorbidity can lead to fragmented care [O1]<sup>75,80</sup> because it often leads to the involvement of multiple providers [M1]<sup>80</sup>, territorial specialists [M2]<sup>58</sup> and multiple care locations [M3]<sup>92</sup>. This complexity of care can lead to poor communication between primary and secondary care [O2]<sup>15,36,58,80,84,92</sup>, duplication of efforts [O3]<sup>92</sup>, confusion about what has been done (i.e., tests, treatments, and medications) [O4]<sup>80</sup>, treatment errors [O5]<sup>80</sup>, impaired treatment participation (i.e., lack of understanding of what is happening with a patient's care due to fragmentation, so the provider may not add to the care because they don't want to confuse things more) [O6]<sup>80</sup>; high use of specialty services [O7]<sup>15</sup>, and lack of care coordination or the consideration of a holistic approach to care [O8]<sup>79</sup>.</p>                                                                                                                                                                                                                                                                                                                                                                                                                                                                                                                                                                                                                                                                                                                                                                                              |

|  |                                                                                                                                                                                                                                                                                                                                                                                                                                                                                                                                                                                                                                                                                                                                                                                                                                                                                                                                           |
|--|-------------------------------------------------------------------------------------------------------------------------------------------------------------------------------------------------------------------------------------------------------------------------------------------------------------------------------------------------------------------------------------------------------------------------------------------------------------------------------------------------------------------------------------------------------------------------------------------------------------------------------------------------------------------------------------------------------------------------------------------------------------------------------------------------------------------------------------------------------------------------------------------------------------------------------------------|
|  | <p><b>Facilitator:</b> Health information technology tools, including integrated EMRs and telehealth solutions [M1], can help with patient care coordination [O1]<sup>46,47,58,62</sup>.</p> <p><b>Facilitator:</b> Clinical tools (including those that focus providers on functional, rather than disease-related outcomes) [M1]<sup>61</sup>, and those that provide multi-morbidity decision support [M2]<sup>74</sup> and assessment [M3]<sup>89,92</sup>) can help providers more optimally manage patients with multiple chronic conditions [O1]<sup>74</sup> and can optimize medication management [O2]<sup>86</sup>.</p> <p><b>Facilitator:</b> Multimorbidity can be better managed [O] through integrating similar disease processes<sup>73</sup> [M1], adopting additional health conditions into existing management practices [M2]<sup>93</sup>, and highlighting links between management practices [M3]<sup>93</sup></p> |
|--|-------------------------------------------------------------------------------------------------------------------------------------------------------------------------------------------------------------------------------------------------------------------------------------------------------------------------------------------------------------------------------------------------------------------------------------------------------------------------------------------------------------------------------------------------------------------------------------------------------------------------------------------------------------------------------------------------------------------------------------------------------------------------------------------------------------------------------------------------------------------------------------------------------------------------------------------|
